# Supplementary material for: Marginal Zone B Cells Assist With Neutrophil Accumulation to Fight Against Systemic Staphylococcus aureus Infection
Source: Front Immunol. 2021 May 10;12:636818. doi: 10.3389/fimmu.2021.636818 (PMC8141640; doi:10.3389/fimmu.2021.636818)
Supplement: Supplementary file 1 [file DataSheet_1.xlsx]

## Sheet: 工作表1
Supplementary Dataset 1: Genes with up-or down-regulation for 1.5 fold in MZ B cells or splenic neutrophils isolated from mice before and 4 hours after infection with S. aureus (2.5 × 10^6 CFU).
Notes : Fold change >= 1.5		Notes : Fold change >= 1.5
[MZ B cells 4h] vs [MZ B cells 0h]		[Neutrophils 4h] vs [Neutrophils 0h]
# Technology: Affymetrix.GeneChip.ClarionTM D Array, mouse		# Technology: Affymetrix.GeneChip.ClarionTM D Array, mouse
Up-regulation	Down-regulation	Up-regulation	Down-regulation
1500012F01Rik|Snord12	1700001G17Rik	0610009B22Rik	0610007P14Rik
1700016G14Rik	1700009J07Rik	0610009E02Rik	1110008L16Rik
1700017B05Rik	1700069B07Rik	0610030E20Rik	1190002N15Rik
1700029J07Rik	1810013L24Rik	1110002J07Rik	1300002E11Rik
1700058P15Rik|AC148988.2	2410016O06Rik	1110007C09Rik	1500009L16Rik
1700109H08Rik	2510009E07Rik	1110008E08Rik	1500011B03Rik
1700113A16Rik	2610044O15Rik8	1110008F13Rik	1700017B05Rik
1700122H20Rik	2610301B20Rik	1110012L19Rik	1700025G04Rik
1810022K09Rik	4930488L21Rik	1110032F04Rik	1700040L02Rik
1810032O08Rik|Snord1b|Snord1c|Snord1a	4930522N08Rik	1190002F15Rik	1700054O19Rik
2010001K21Rik	5031414D18Rik	1500002F19Rik	1810022K09Rik
2010007H06Rik	5031439G07Rik|Mir1249	1600014C10Rik	1810026J23Rik
2010107E04Rik	5430417L22Rik|Inafm2|RP23-172B16.3	1700001J11Rik	1810030O07Rik
2010320O07Rik|AC133646.2	6030458C11Rik	1700001P01Rik	1810046K07Rik
2210411M09Rik|RP23-390I1.2	6720489N17Rik	1700013D24Rik	2010007H06Rik
2310001K24Rik	9830147E19Rik	1700016G14Rik	2210013O21Rik
2410002F23Rik|Snord88a	9930021J03Rik	1700020L24Rik	2210016F16Rik
2610024D14Rik	A130077B15Rik	1700023F06Rik	2300009A05Rik
2610318N02Rik	A430078G23Rik	1700023H06Rik|RP23-128L22.2	2310057M21Rik
2700038G22Rik	A630066F11Rik	1700025C18Rik	2410002F23Rik|Snord88a
2810455O05Rik|AC147266.3	Abca1	1700025N21Rik|RP24-421D7.2	2410015M20Rik
4631423B10Rik	Abcc3	1700027A07Rik|AL592169.2	2510002D24Rik
4833407H14Rik|LOC100503558	Abcd3	1700031F10Rik|RP23-74G1.2	2510039O18Rik
4930426D05Rik	Abcg1	1700037H04Rik	2510046G10Rik
4930428O21Rik	Abcg3	1700047M11Rik	2610008E11Rik
4930444E06Rik|RP23-35E16.3	Abhd2	1700058P15Rik|AC148988.2	2610021A01Rik
4930448D08Rik|AC108433.3	Acaa2	1700061E18Rik|RP23-21E23.2	2610044O15Rik8
4930515G13Rik	Acad11	1700066C05Rik	2610301B20Rik
4930551O13Rik|RP23-379M5.3	Ace	1700071M16Rik	2610318N02Rik
4930555K19Rik	Acsf2	1700095A13Rik	2610507B11Rik
5031434O11Rik	Acvr1b	1700102P08Rik	2700038G22Rik
5430416N02Rik	Adamdec1	1700112E06Rik	2700060E02Rik
5730596B20Rik	Adap2	1700122H20Rik	2700062C07Rik
5830428M24Rik	Add3	1810008B01Rik	2810004N23Rik
5830462I19Rik	Adgre1	1810011H11Rik	3010003L21Rik
6330407A03Rik	Adgre4	1810013L24Rik	3110040N11Rik
9030025P20Rik	Adipor2	1810037I17Rik	4631423B10Rik
9330175E14Rik	Adnp2	1810055G02Rik	4632415L05Rik
A230050P20Rik	Ado	2010005H15Rik	4921524J17Rik
A530040E14Rik	Afp	2010110E17Rik|RP23-279M5.1	4930453N24Rik
A530064D06Rik	Agk	2010110K18Rik	4930522L14Rik
A630001G21Rik	Agl	2210411M09Rik|RP23-390I1.2	4930570N18Rik|AL365322.3
A730011C13Rik	Ago4	2210417A02Rik	4931406P16Rik
A930013F10Rik	AI467606	2310001H17Rik	5031414D18Rik
Abhd11	AI606181	2310015A10Rik	5031439G07Rik|Mir1249
AC166333.1	Ak3	2310043M15Rik	5430403G16Rik
Acap1	Akt3	2310044K18Rik|AC158576.3	5430417L22Rik|Inafm2|RP23-172B16.3
Ackr3	Alas2	2310047D07Rik	5830417I10Rik
Acot13	Aldh6a1	2410021H03Rik	5830468F06Rik|RP23-81K14.3
Acot2	Alg10b|Mir7648	2700012I20Rik	6030458C11Rik
Adam28	Alg11	2700046A07Rik	6230400D17Rik
Adamts10	Alg14	2700068H02Rik|RP23-159J7.4	9130401M01Rik
adapt33_2	Alox5ap	2700099C18Rik	9330161L09Rik
adapt33_3	Ank|Mir7117	2810002D19Rik	9430016H08Rik
adapt33_4	Ankmy2	2810013P06Rik	A430078G23Rik
Adck5	Ankrd13a	2810417H13Rik	A630033H20Rik
Adpgk	Ano10	2810474O19Rik	A730017L22Rik
Ahr	Ano6	2900089D17Rik|AC121845.3	A930005H10Rik
AI506816	Anp32-ps	3930402G23Rik	AA413626
AI607873	Antxr2	4731419I09Rik	AA415398
Akap8l	Anxa4	4732440D04Rik	Aaed1
Alg12	Anxa5	4732465J04Rik	Aasdhppt
Alg3	Anxa6	4833407H14Rik|LOC100503558	Aatf
Alkbh1	Ap1b1	4833413E03Rik|RP23-106N22.1	Abca1
Alpl	Ap2b1	4833419F23Rik	Abca2
Amica1	Aph1a	4833438C02Rik	Abca3
Amigo3	Appl1	4921507P07Rik	Abca6
Anapc15-ps	Aqp1	4921509O07Rik	Abca9
Angptl1	Arfip1	4930408O17Rik	Abcb10
Ankrd23	Arhgap18	4930431P03Rik	Abcb1a
Apol7c	Arhgap19	4930461C15Rik|RP24-293N14.2	Abcb4
Apol8	Arhgap5	4930469K13Rik|RP23-73A4.3	Abcb7
Apold1	Arhgef12	4930479D17Rik	Abce1
Arg2	Arl11	4930487H11Rik	Abcf1
Arglu1|Mir7654	Arl6ip1	4930488B22Rik	Abcg1
Arid5a	Arl6ip5	4930518I15Rik	Abcg3
Arl5b	Arrb1	4930519P11Rik	Abcg4
Asb13	As3mt	4930526A20Rik	Abhd12
Asprv1	Asah1	4930551O13Rik|RP23-379M5.3	Abhd14b
Atad3a	Asah2	4930555K19Rik	Abhd15
Atf3	Asb2	4930558J22Rik|RP23-480B19.17	Abhd17a
Atf4	Ate1	4930562F07Rik	Abhd17b
Atp5g1	Atf7ip	4930564D02Rik	Abhd4
Atp6v0b	Atl3	4930581F22Rik	Abhd6
Atxn2l	Atp10d	4930591A17Rik	Abhd8
B230325K18Rik	Atp11c	4930593C16Rik	Abi2
B230398E01Rik	Atp1b1	4930594C11Rik	Abi3
B3gnt7	Atp6v1e2	4930595D18Rik	Abi3bp
B4galt5	Atp7a	4930597O21Rik	Abl1
Bach2it1|RP23-24E11.3	AU041133	4930599N23Rik	Abl2
Bag3	Axl	4933408B17Rik	Ablim1
Bambi	B3galnt2	4933412O06Rik	AC138368.1
Banf1	BC005537	4933416M07Rik	Acaa2
Batf	Bcdin3d	4933424M12Rik|RP23-184N11.4	Acaca
BC051142	Bckdha	4933432I03Rik	Acat1
BC051226	Bcl2	5330427O13Rik	Acbd6
BC094916	Bivm	5430405H02Rik	Acd
Bc1	Bod1l	5430427O19Rik	Ace
Bc1	Bphl	5830428M24Rik	Acly
BC147527	C030013G03Rik	5830444B04Rik	Aco1
Bcl2a1a	C1galt1	5930403N24Rik	Aco2
Bcl2a1b|Bcl2a1a	C1qc	6330407A03Rik	Acot1
Bcl3	C2cd2	6330416G13Rik	Acot13
BE692007	C6	6430628N08Rik|RP23-374N19.4	Acot2
Bhlhe40	Calcrl	9030204H09Rik	Acp1
Blk	Calhm2	9130221H12Rik	Acp5
Bop1	Capn2	9130230L23Rik	Acsbg1|Gm2069
Brd9	Car1	9230111E07Rik|Gm14321|RP24-151H6.4|RP24-151H6.3	Acsf2
Bst2	Car2	9330133O14Rik	Acss1
Btg3|Gm7334	Casc5	9330159N05Rik	Acss2
C030013D06Rik|RP23-121M22.4	Cast	9330160F10Rik	Actl6a
C130026I21Rik|A530032D15Rik	Cbx3-ps1	9430060I03Rik	Actr8
C3	Cbx3-ps4	9830107B12Rik	Adamts6
C530030P08Rik	Ccdc15	9830166K06Rik	Adat1
C5ar1	Ccdc25	9930004E17Rik|RP24-195I15.7	Adat3|Scamp4
Cacybp	Ccdc47	A130014A01Rik|RP23-441L19.1	Adcy3
Car15	Ccdc79	A230046K03Rik	Adcy7
Casp4	Ccdc82	A230072I06Rik	Add2
Cass4	Ccnd3-ps	A430105J06Rik	Add3
Ccdc115	Ccng1	A530013C23Rik	Adgre4
Ccdc116	Ccnh	A530046M15Rik	Adgrg1
Ccdc117	Ccr3	A530064D06Rik	Adgrg5
Ccdc84	Cd151	A530088E08Rik	Adgrl1
Ccl3	Cd163	A530099J19Rik	Adh5
Ccl4	Cd209d	A630001O12Rik	Adi1
Ccnd2	Cd5l	A630066F11Rik	Adm
Ccnl1	Cdc25b	A730008H23Rik|Hjurp|6430706D22Rik	Ado
Ccnl2	Cdc42ep3	A730011C13Rik	Adora2a
Ccnyl1	Cdk19	A730013G03Rik	Adsl
Ccr7	Cdon	A730045E13Rik	Aes
Ccrl2	Cds2	A730061H03Rik	Aff3
Cct2	Cdyl2	A730081D07Rik|RP24-386G2.2	Afg3l2
Cd14	Ceacam1	A830035O19Rik	Afp
Cd274	Ceacam2	A930013F10Rik	Agap2
Cd300lf	Cep170	A930015D03Rik	Agfg2
Cd3e	Cep350	AA467197|Mir147	Agk
Cd5	Cep83os	AA619741	Ago1
Cd69	Cfap97	Abca13	Agpat3
Cd72	Chd4|Mir7045	Abca7	Ahctf1
Cd83	Chd9	Abcc1	Ahcy|Gm4737
Cd86	Chil3	Abcc5	Ahcyl2
Cdk16	Chst15	Abhd1	Ahnak|Mir6367
Cdk4	Chst3	Abhd5	Ahr
Cdkn1a	Chsy1	Abr	AI504432
Ceacam16	Clec12a	Abra	Aicda
Cenpa	Clec4a3	Abtb2	Aida
Cep57	Cmtm6	Acaa1a	Aim1
Chchd4	Cnksr3	Acaa1b	Aimp1
Chil1	Cnr2	Acadsb	Ak3
Chkb	Coa5	Acot9	Akap11
Chrac1	Cpm	Acp2	Akap12
Chst11	Cpne3	Acpp	Akap8
Ciart	Cpt1a	Acrbp|Ing4	Akap9
Cish	Cpt2	Acsl1	Akip1
Cited2	Cr2	Acsl4	Akr1a1
Cks2	Cr2	Acta2	Akr1b10
Clasrp	Crebl2	Acvrl1	Akr1b3|Gm6644
Clec4d	Crebrf	Ada	Akr1c13
Clec4e	Crip2	Adam15	Akr7a5
Clec7a	Crkl	Adam17	Akt3
Clk1	Csf1r	Adam19	Alad
Clk3	Csnk1g3	Adam8	Alas2
Cmpk2	Csnk2a1-ps	Adam9	Aldh18a1
Commd7	Ctbs	Adamtsl4	Aldh1a1
Coq10b	Ctdsp2|Mir26a-2|Mir546	Adap2os|RP23-7J19.3	Aldh1a7
Cpne2	Ctnna1	Adar	Aldh9a1
Cpt1b	Ctns	Adgb	Alg11
Crtc2	Ctse	Adgrg3	Alg3
Csf1	Cwf19l2	Adhfe1	Alg5
Csf2ra	Cyp39a1	Adora2b	Alg9
Csf3r	Cyp4f18	Adpgk	Alkbh1
Csrnp1	Cyth3	Adprh	Alkbh7
Csrp2	D17H6S53E	Adrb2	Alkbh8
Ctla4	D17H6S56E-5	Adtrp	Als2cl
Ctps	D1Ertd448e	Aff2	Alyref2
Cxcl1	D3Ertd254e	Agap1	Amd2|Amd1
Cxcl10	D5Ertd683e	Ager	Amd-ps1
Cxcl13	Dcaf7	Agl	Amd-ps3
Cxcl16	Dck	Agpat2	Amd-ps4
Cxcl2	Dclre1b	Agrn	Anapc1
Cxcl3	Ddit4	Agtrap	Anapc5
Cxcl9	Decr1	Ahi1	Ang2
Cypt14	Dennd4c	AI607873	Angel1
Cytip	Dennd6a	AI839979	Ank|Mir7117
D130007C19Rik	Dhrs7	Ak3l2-ps	Ank1
D130062J21Rik	Dnaaf2	Akirin1-ps	Ankib1
D630041G03Rik	Dnajc10	Akr1c18	Ankle2
D730001G18Rik	Dnajc13	Alas1	Ankmy2
Dalrd3	Dock11	Aldh3b1	Ankrd10|Mir7238
Dclre1c	Dpy19l4	Alox15	Ankrd26
Dctn3	Dpysl2	Alox5	Ankrd49
Ddit3	Dr1	Alox5ap	Ankrd50
Ddx24	Dse	Alpk1	Anp32b
Ddx26b	Dubr	Ambp	Anp32b-ps1
Ddx39b|Mir8094	Dusp28	Amer2	Anxa6
Ddx51	Dusp7	Amn1	Ap1b1
Ddx60	E030042O20Rik	Ankrd16	Ap1g2
Defb46	E430025E21Rik	Ankrd22	Ap1s3
Dennd6b	Ear12|Ear2|Ear3	Ankrd28	Ap3s2
Derl3	Ear-ps2	Ankrd33b	Apba1
Dhx58	Edem3	Ankrd37	Apeh
Dimt1	Eea1	Ankrd44	Apex1
Dis3	Efcab9	Ankrd46	Aph1a
DLEU2_5	Efr3a	Ankrd66	Aplp2
Dnajb1	Egln1	Ankzf1	Apoe
Dnajb9	Eif3f	Anln	Apol11b
Dot1l	Eif3s6-ps2	Antxr2	Apol7b
Dpp7	Entpd5	Anxa1	Apol7e
Drr1	Entpd7	Anxa11	Apoo-ps
Dtx3	Epb41l3	Anxa11os|RP24-530J21.3	Aqp1
Dusp1	Epb42	Anxa2	Aqr
Dusp10	Eps15	Anxa3	Ar
Dusp4	Erbb2ip	Aoah	Arap2
Dusp5	Erlin2	Ap3s1	Arhgap12
Dvl1	Ermap	Ap3s1-ps1	Arhgap17
E030047D23Rik	Ern1	Ap3s1-ps2	Arhgap27os3
E230008O15Rik	Esyt1	Apaf1	Arhgap35
E2f4	Esyt2	Apbb3	Arhgap5
E330020D12Rik	Etaa1	Aph1b	Arhgef12
Ear4|Ear-ps8	Etohi1	Aph1c	Arhgef18
EGOT	Ets1	Apmap	Arid1b
Egr1	Exo5	Apoa2	Arl4c
Egr2	Exoc8	Apobec3	Arl6ip5
Egr3	Fahd1	Apobr	Armc1
Eid3	Faim	Apold1	Armc10
Eif2a	Fam126a	App	Arntl
Eif2ak2	Fam149a	Aqp9	Arpc5l
Eif4a1	Fam179b	Arap3|Mir6981	Arsk
Eif4a2|Snord2|Snora81	Fam199x	Arf2	Art2b
Eif5a	Fam208a	Arg2	Arv1
Emc4	Fam35a	Arhgap11a	Arxes1
Eno3	Fam3c	Arhgap19	As3mt
Erdr1	Fam49a	Arhgap24	Asb13
Ermard	Fam63b	Arhgef3	Asb17os
Errfi1	Fam8a1	Arhgef39	Asf1a
Ets2	Fbxo42	Arid3a	Ash2l
Etv6	Fcna	Arid5a	Asrgl1
F10	Fech	Arid5b	Atad3a
Fabp5l2	Fez2	Arih2	Atf3
Fam104a	Fhdc1	Arl13b	Atf6
Fam133b	Fkbp5	Arpc1a	Atg13
Fam193b	Flna	Arpc1b	Atg2b
Fam196b	Fn3krp	Arpc3	Atg4c
Fam46c	Fpgt	Arrb2|Mir7115	Atic
Fanca	Frs2	Arrdc4	Atl3
Fas	Fut11	Arsg	Atm
Fastkd2	Fv1	Asb7	Atmin
Fbrs	G2e3	Asf1b	Atp1a1
Fbrsl1	Galnt1	Asns	Atp1b1
Fbrsl1	Galnt4	Asnsd1	Atp1b2
Fgd2	Gatad1	Aspm	Atp1b3
Fgfr1op	Gcc2	Asprv1	Atp2a3
Fnbp4	Gdap2	Atat1	Atp2b4|Mir6903
Fos	Gdf11	Atg16l1	Atp5a1
Fosb	Gdpgp1	Atg16l2	Atp5d
Fosl1	Gfpt1	Atg9a	Atp5g2
Fosl2	Gfra2	Athl1	Atp5sl
Foxe3	Gimap1	Atox1	ATP8|ATP6|COX3
Foxred1	Gjb4	Atp11a	Atp8b2
Fpr1	Gkap1	Atp2b4	Atpaf2
Fpr2|Fpr3	Glg1	Atp2c1	Atr
Fth-ps2	Glo1	Atp6v0a1	Atraid
Ftsj1	Gm10033	Atp6v0b	AU020206
Fzd5	Gm10198	Atp6v0c|Atp6v0c-ps2	AU041133
G530011O06Rik	Gm10253	Atp6v1a	Aup1
Gabbr1	Gm10336	Atp6v1e1	Aven
Gadd45a	Gm10416	Atp6v1g1	AW112010
Gadd45b	Gm10715	Atp8b4	Axin2
Gbp10|Gbp6	Gm10717	Atrn	Axl
Gbp11	Gm10719	Atrnl1	AY036118
Gbp4	Gm10720	Atxn10	B3galt4
Gbp8	Gm10778	Atxn7l1os2|RP24-80F17.2	B3gnt5
Gbp9	Gm10778	Aurka	B4galnt1
Gch1	Gm10801	Aurkb	Bach2
Gdap10	Gm11008|RP23-83O23.1	Avpr2	Bach2it1|RP23-24E11.3
Gdi1	Gm11009	AW011738	Bag3
Gem	Gm11034	B130046B21Rik	Bag5
Gla	Gm11168	B230398E01Rik	Bank1
Gm10012	Gm11172	B430306N03Rik	Bax
Gm10038	Gm11204	B4galt3	Bbs2
Gm10039	Gm11253	B4galt6	BC002059
Gm10135	Gm11507	B630019K06Rik	BC017158|Mir3103
Gm10142	Gm11673	B930078G14Rik	BC021614
Gm10144	Gm11707|RP23-170A23.4	B9d2	BC028528
Gm10153	Gm11760	Basp1	BC035044
Gm10169	Gm11765	Batf	BC085271
Gm10177	Gm11821	Batf2	BC094916
Gm10205	Gm11852	Baz2b	BC147527
Gm10217	Gm12009	BC017643	Bcap29
Gm10254	Gm12019	BC023105	Bcar3
Gm10269	Gm12043|RP23-218C5.2	BC025446	Bccip
Gm10337	Gm12065|RP23-365O24.2	BC048602	Bckdha
Gm10349	Gm12074	BC100451	Bckdhb
Gm10374	Gm12079	BC100530|BC117090|Stfa3	Bckdk
Gm10462	Gm12112	BC106175	Bcl11a
Gm10552	Gm12395|RP23-411B7.3	BC117090	Bcl11b
Gm10553	Gm12430	Bcl10	Bcl2
Gm10576	Gm12492	Bcl2a1a	Bcl7a
Gm10663	Gm12493|RP23-402I8.2	Bcl2a1b|Bcl2a1a	Bcl7b
Gm10736	Gm12703|RP23-135A21.4	Bcl2a1c	Bcl9l
Gm10737	Gm12731	Bcl2a1d	Bclaf1
Gm10865	Gm12741	Bcl2l11	Bdh1
Gm10874	Gm12757	Bcl3	BE692007
Gm10974	Gm12804	Bcl6	Bend3
Gm11060	Gm12815	Bend4	Bend5
Gm11115	Gm12816	Best1	Bhlhe41
Gm11131|RP23-331E12.9	Gm12834	Bglap	Bin1
Gm11175	Gm12852	Bhlha9	Birc6
Gm11187|RP23-388J21.1	Gm12955	Bin2	Bivm
Gm11195|RP23-151A11.4	Gm13050	Bin3	Blk
Gm11247|RP23-236A12.1	Gm13080	Birc3	Blnk
Gm11261|RP23-189G9.1	Gm13118	Birc5	Blvrb
Gm11331	Gm13120	Blcap	Bmi1
Gm11402|RP23-198N14.4	Gm13126	Bloc1s3	Bms1
Gm11408	Gm13135	Bloodlinc|RP23-226P4.1	Bop1
Gm11439	Gm13136	Bmp10	Borcs7
Gm11440	Gm13140	Bmpr1a	Bpgm
Gm11499|RP23-149O19.1	Gm13169	Bnip2	Bphl
Gm11518	Gm13233	Braf	Brat1
Gm11575	Gm13244	Bricd5	Bri3bp
Gm11594	Gm13329	Brip1	Brix1
Gm11640|RP23-35E7.4	Gm13378	Brwd3	Brwd1
Gm11660	Gm13416	Bst1	Btaf1
Gm11706|RP23-170A23.2	Gm13422	Btbd10	Btbd11
Gm11737	Gm13534	Btnl9	Btbd2
Gm11745	Gm13579	Bub1	Btg3|Gm7334
Gm11788|RP23-82I5.15	Gm13603	Bub1b	Btla
Gm11801	Gm13680	C030010L15Rik|RP23-49H16.2	Bysl
Gm11805	Gm13767	C1qtnf9	Bzw2
Gm11807|RP23-76M24.1	Gm13768	C1ra	C1qbp
Gm11815|RP23-172G14.2	Gm13788	C1rb	C2cd3
Gm11851|RP23-323E6.1	Gm13797	C1rl	C87436
Gm11863|RP23-415F19.1	Gm13910	C230066G23Rik|AC138265.1	Cabin1
Gm11883|RP23-25B10.2	Gm14020	C3	Cacna1e
Gm11886|RP23-335F19.1	Gm14058	C330027C09Rik	Cacna1i
Gm11887|RP23-335F19.2	Gm14308|Gm14430|Gm14432|Gm14434|0610010B08Rik|Gm4724|Gm4631	C530050E15Rik	Cacybp
Gm11900|RP23-86J22.3	Gm14325	C5ar1	Cad|Mir6369
Gm11912	Gm14387	Cacfd1	Calhm2
Gm11937	Gm14392	Calml3	Camk2b
Gm11938	Gm14399	Camkk1	Camk2d
Gm11939	Gm14405	Camp	Camk4
Gm11951	Gm14409	Camta2	Camkmt
Gm11974	Gm14412	Capn1	Camsap1
Gm11991	Gm14416	Capns2	Camsap2
Gm11995|RP23-138G17.1	Gm14421	Capza1	Cand1
Gm11997	Gm14429	Card9	Cand2
Gm12111|RP23-94F11.5	Gm14431|Gm8898	Casc5	Capn2
Gm12114|RP23-413O19.2	Gm14431|Gm8898	Casd1	Capn5
Gm12168	Gm14431|Gm8898|Gm4245	Cask	Caprin1
Gm12185|Tgtp1	Gm14431|Gm8898|Gm4723	Casp1	Car1
Gm12188	Gm14444	Casp4	Car2
Gm12197|RP23-121P11.4	Gm14510	Casp8	Card11
Gm12226	Gm14519	Cass4	Card6
Gm12240	Gm14536	Cbln3	Carm1
Gm12246|RP23-293I3.3	Gm14562	Ccdc125	Carnmt1
Gm12250	Gm14584	Ccdc186	Casc4
Gm12256|RP23-419P16.11	Gm14631	Ccdc189	Casp2
Gm12276	Gm14923	Ccdc71l	Casp6
Gm12346	Gm14942	Ccdc80	Cat
Gm12355	Gm15013	Ccdc84	Cbfa2t2-ps1
Gm12398|RP23-304H5.2	Gm15027	Ccdc88b	Cbfa2t3
Gm12418	Gm15057	Ccin	Cblb
Gm12424	Gm15164	Ccl19|Gm2023	Cbr1
Gm12437|RP23-141C15.4	Gm15192	Ccl19|Gm2457	Cbx3
Gm12454	Gm15267	Ccl19|Gm2564	Cbx3-ps1
Gm12509	Gm15303	Ccl19-ps1	Cbx3-ps4
Gm12521|RP23-316M11.3	Gm15381	Ccl4	Cbx3-ps5|Gm5792
Gm12573	Gm15382	Ccna2	Cbx3-ps7
Gm12590|RP23-342H16.5	Gm15429	Ccnb1	Cbx7
Gm12651|RP23-3E2.2	Gm15443	Ccnb2	Ccdc171
Gm12652|RP23-66O9.1	Gm15495	Ccne2	Ccdc50
Gm12727	Gm15583	Ccnf|Mir5134	Ccdc50-ps
Gm12751	Gm15773	Ccng2	Ccdc58
Gm12790	Gm15842	Ccnj	Ccdc6
Gm12840|RP23-99G21.3	Gm15989	Ccnl1	Ccdc66
Gm12841|RP23-133J9.5	Gm16100	Ccnl2	Ccdc69
Gm12846	Gm16284	Ccno	Ccdc88a
Gm12891	Gm16299|AC117805.2	Ccnyl1	Ccdc90b
Gm12895	Gm16336	Ccr1	Ccl5
Gm12971|RP23-412B2.1	Gm16354	Ccr10	Ccl9
Gm12993	Gm16355	Ccrl2	Ccm2
Gm13008|RP23-161N17.13	Gm16358	Cd14	Ccnd2
Gm13012	Gm16363	Cd177	Ccnh
Gm13018|RP23-416J8.1	Gm16421	Cd200r1	Ccny
Gm13160	Gm16439	Cd274	Ccr2
Gm13167	Gm16550	Cd300lf	Ccr3
Gm13232	Gm17014	Cd302	Ccr6
Gm13237	Gm17025|RP23-51J23.4	Cd33	Ccr7
Gm13276	Gm17332	Cd52	Ccr9
Gm13277|Gm13285	Gm17377	Cd63	Cct2
Gm13363	Gm17402	Cd69	Cct3
Gm13392	Gm17428	Cd80	Cct3-ps1
Gm13401	Gm17535	Cd9	Cct4
Gm13420|RP23-304D11.2	Gm17538	Cd9-ps	Cct5
Gm13451	Gm17576	Cdadc1	Cct6a|Snora15
Gm13461	Gm17617	Cdc14a	Cct7
Gm13468|RP23-103G12.1	Gm18343	Cdc20	Cct8
Gm13487	Gm18953	Cdc25a	Cd160
Gm13492	Gm19453	Cdc25c	Cd163l1
Gm13496|RP23-244N6.7	Gm19496	Cdc27	Cd180
Gm13511	Gm19552	Cdc42bpg	Cd19
Gm13519|RP23-35D6.1	Gm19579	Cdc42ep2	Cd1d2
Gm13563|RP23-306D20.7	Gm19680	Cdc42ep4	Cd2
Gm13570	Gm19743	Cdc45	Cd200
Gm13572|RP23-78D16.2	Gm19752	Cdc7	Cd209a
Gm13584|RP23-399K8.4	Gm19905	Cdca2	Cd22
Gm13588	Gm19960	Cdca3	Cd226
Gm13609|RP23-55I14.7	Gm20064	Cdca5	Cd247
Gm13624	Gm20207	Cdca8	Cd27|Mir8113
Gm13701|RP23-202M10.1	Gm20253	Cdk1	Cd28
Gm13765|RP23-309M6.3	Gm2026	Cdk2	Cd2ap
Gm13770	Gm2058	Cdkl4	Cd300e
Gm13800|RP23-246E11.1	Gm20599	Cdkn1a	Cd300lg
Gm13805|RP23-392O16.1	Gm20652|RP23-398K14.3	Cdkn2d	Cd36
Gm13833|RP23-459L15.2	Gm20656	Cdkn3	Cd38
Gm13877	Gm20775	Ceacam1	Cd3d
Gm13988	Gm20939	Ceacam10	Cd3e
Gm13989|RP23-169H17.1	Gm21060	Ceacam18	Cd3g
Gm14043|RP23-358G23.3	Gm21746	Ceacam2	Cd4
Gm14060|RP23-181O3.2	Gm21800	Cebpd	Cd40lg
Gm14063|RP23-109J20.1	Gm21836	Cebpe	Cd48
Gm14079|RP23-139H14.3	Gm21866	Celsr3	Cd5
Gm14087|RP23-158L6.1	Gm21980|RP23-18C19.2	Cenpe	Cd55
Gm14137	Gm22021	Cenpf	Cd55b
Gm14142	Gm22057	Cenpj	Cd59a
Gm14199|RP23-414F8.5	Gm22109|Rn5s23	Cenpl	Cd6
Gm14212	Gm22155	Cenpu	Cd7
Gm14219	Gm22201	Cep128	Cd72
Gm14253	Gm22211	Cep19	Cd74|Mir5107
Gm14265|RP23-161B3.4	Gm22226	Cep55	Cd79a
Gm14277	Gm22265	Cep83	Cd79b
Gm14438	Gm22291|Rn5s30	Cep85l	Cd83
Gm14494	Gm22334	Cept1	Cd86
Gm14497	Gm22422	Cers6	Cd8a
Gm14539	Gm22423	Cfb	Cd8b1
Gm14604|RP23-260P9.1	Gm22456	Cflar	Cd93
Gm14646|RP23-44A17.1	Gm22488	Cfp	Cd96
Gm14654	Gm22516	Ch25h	Cdc14b
Gm14658|RP23-226L1.2	Gm22581	Chil1	Cdh17
Gm14672|RP23-302D20.1	Gm22622	Chil3	Cdk4
Gm14675|RP23-322K21.4	Gm22673	Chil4	Cdk6
Gm14689|RP23-24K4.2	Gm22676	Chil5	Cdkal1
Gm14693|RP23-24K4.3	Gm22748	Chit1	Cdkn2aipnl
Gm14700	Gm22767	Chka	Cdon
Gm14702	Gm22785	Chkb	Cdr2
Gm14708|RP23-224M8.3	Gm22806	Chmp2a	Cdt1
Gm14734|RP23-272G10.3	Gm22840	Chp1	Cdv3
Gm14737|RP23-461P10.1	Gm22866	Chrm3	Cdyl2
Gm14738|RP23-461P10.2	Gm22973	Chst11	Cebpa
Gm14749	Gm22978	Ciapin1	Cecr2
Gm14763|RP23-311G7.2	Gm22980	Cib2	Cecr5
Gm14778|RP23-335N15.2	Gm22984	Cish	Celsr1
Gm14782	Gm23040	Ckap2	Cep97
Gm14785	Gm23054	Ckap2l	Cerk
Gm14788	Gm23055	Cklf|A730028G07Rik	Cers4
Gm14789|RP23-57I15.2	Gm23125	Cks2	Ces2g
Gm14801|RP23-418O17.1	Gm23143	Cldn1	Cetn2
Gm14807	Gm23201	Cldn15	Cetn3
Gm14814|RP23-437A4.2	Gm23205	Clec12a	Cfap20
Gm14888|RP23-150G4.2	Gm23284|Rn5s31	Clec2d	Cfdp1
Gm14889|RP23-303A21.2	Gm23287	Clec2j	Cfh
Gm14912	Gm23375	Clec3b	Champ1
Gm14928	Gm23376	Clec4a2	Chchd3
Gm14929|RP23-79L4.1	Gm23444	Clec4a4	Chd1l
Gm14941|RP23-74L11.2	Gm23472	Clec4b2	Chd3
Gm14944|RP23-302B23.2	Gm23510	Clec4d	Chd6
Gm14969|RP23-318H22.2	Gm23511	Clec4e	Chd9
Gm15033	Gm23530	Clec4n	Chordc1
Gm15035	Gm23540	Clec5a	Chpf
Gm15064|RP23-235P16.1	Gm23613	Clk1	Chst10
Gm15135|AC123830.11	Gm23615	Clk3	Chst3
Gm15145|RP23-228N14.5	Gm23628	Cln3	Chsy1
Gm15146|RP23-228N14.2	Gm23647	Cln5	Chtop
Gm15298|RP23-232B3.4	Gm23663	Cmah	Ciao1
Gm15356|AC122800.3	Gm23664	Cmklr1	Ciart
Gm15371	Gm23679	Cmpk2	Ciita
Gm15384|RP23-252K7.9	Gm23686	Cnbd2	Cirh1a
Gm15405|RP23-75D10.1	Gm23737	Cntln	Cisd1
Gm15433	Gm23738	Cntrl	Cisd3
Gm15445|AC133097.2	Gm23739	Col4a3bp	Clasp2
Gm15452	Gm23764	Coq4	Clcn3
Gm15459	Gm23793	Cox6a2	Cldn13
Gm15470	Gm23806	Cox7b2	Cldn34d
Gm15533|AC124461.3	Gm23849	Cpeb4	Clec2i
Gm15580	Gm23928	Cpne2	Clec4a3
Gm15604	Gm23971	Cpne3	Cln6
Gm15607	Gm23977	Cpt1b	Clnk
Gm15650|AC122871.4	Gm2399	Crat	Clns1a
Gm15662	Gm24032	Creb1	Clock
Gm15717|AC114995.4	Gm24043	Crebl2	Cltb
Gm15724|RP23-246B24.3	Gm24051	Crispld2	Cluh
Gm15753	Gm24089	Crk	Clybl
Gm15758|AC109200.1	Gm24104	Crry-ps	Cmss1
Gm15782	Gm24203	Crtc2	Cmtm3
Gm15801	Gm24253	Cry1	Cnbp
Gm15803	Gm24276	Cryab	Cndp2
Gm15835|RP24-163K10.5	Gm24289	Crybg3	Cnksr3
Gm15868|RP24-85F23.4	Gm24312	Csf1	Cnn3
Gm15875|AC120785.3	Gm24403	Csf2ra	Cnnm3
Gm15878	Gm24461	Csf2rb|Mir7676-1|Mir7676-2	Cnot2
Gm15996|RP23-16D9.6	Gm24471	Csf2rb2|Mir7676-1|Mir7676-2	Cnot6l
Gm16026	Gm24494	Csrnp1	Cnp
Gm16026	Gm24497	Ctbp2	Cnpy3
Gm16033|Gm16034|RP23-29H5.7|RP23-29H5.6	Gm24559	Ctbs	Cnr2
Gm16066|AC133523.2	Gm24573	Ctrl	Coa5
Gm16094|AC147806.5	Gm24602	Ctsg	Cobll1
Gm16153|AC133902.3	Gm24624	Cxcl10	Cog5
Gm16216	Gm24651	Cxcl11	Commd4
Gm16229|RP24-492D11.3	Gm24714	Cxcl16	Commd6
Gm16243|RP24-484E17.2	Gm24730	Cxcl17	Comt
Gm16340	Gm24767	Cxcl2	Cops2
Gm16345	Gm24783	Cxcl3	Cops7a
Gm16353	Gm24837	Cxcl9	Coq10a
Gm16379	Gm24888	Cxcr1	Coq5
Gm16380	Gm24907	Cxcr2	Coro2a
Gm16429	Gm24918	Cyb5r1	COX1
Gm16464	Gm24949	Cyb5r4	Cox10
Gm16486	Gm24959	Cyba	Cox11
Gm16511	Gm25005	Cybb	Cox18
Gm16539	Gm25018|Rn5s10	Cyfip1	COX2
Gm16568|RP23-424C4.2	Gm25099	Cyld	Cox7a2l
Gm16570	Gm25128	D130012P04Rik	Cpm
Gm16581	Gm25154	D1Pas1	Cpox
Gm17024|RP23-111F7.2	Gm25202	D430020J02Rik	Cpsf1
Gm17055|RP23-131B11.2	Gm25212|Rn5s28	D430042O09Rik	Cpsf2
Gm17083	Gm25336	D630011A20Rik	Cr2
Gm17090|RP24-500O1.1	Gm25343	D630014O11Rik|RP24-358A14.1	Cr2
Gm17096|RP23-19L12.11	Gm25348	D630041G03Rik	Crbn
Gm17104|RP24-471H15.3	Gm25360	D730005E14Rik	Crebzf
Gm17137	Gm25371	D7Ertd143e|Mir291a|Mir292|Mir293|Mir294|Mir295|Mir291b	Crim1
Gm17147	Gm25394	D830014E11Rik|Lrrc8d	Crip1
Gm17148	Gm25410	D830050J10Rik	Crip2
Gm17160|RP23-182O1.4	Gm25447	D930030I03Rik	Crmp1
Gm17178|RP23-84C12.21	Gm25506	Dab2ip	Crtam
Gm17201|CT7-BM104O10.3	Gm25516	Dach1	Crtap
Gm17275	Gm25517	Dapp1	Crtc1
Gm17334	Gm25520	Dclre1c	Cs
Gm17376	Gm25581	Dctn3	Cse1l
Gm17482	Gm25587	Dcun1d3	Csk
Gm17491	Gm25594	Ddx26b	Csnk1g3
Gm17571	Gm25635	Ddx58	Csnk2a1-ps
Gm17709	Gm25659	Ddx60	Cst7
Gm17728	Gm25663	Dear1	Cstf1
Gm17756	Gm25675	Deb1	Ctdp1
Gm17757|Gm18853	Gm25776	Defb2	Ctdsp2|Mir26a-2|Mir546
Gm17976	Gm25783	Defb20	Ctla2a
Gm18489	Gm25802	Defb40	Ctla2b
Gm18821	Gm25811	Degs1	Ctps
Gm19261	Gm25813	Dennd1c	Ctsa
Gm19294	Gm25818	Dennd3	Ctse
Gm19295	Gm25857	Dennd4a	Ctso
Gm19327	Gm25859	Dennd4b	Ctss
Gm19328	Gm25939	Dennd5a	Ctsw
Gm19329	Gm25949	Depdc1a	Cul5
Gm19347	Gm25970	Depdc1b	Cuta
Gm19363	Gm25989	Dfna5	Cwc27
Gm19369	Gm26071	Dgat1	Cx3cr1
Gm19372	Gm26109	Dgat2	Cxcr5
Gm19400	Gm26175	Dgkg	Cxcr6
Gm19446	Gm26197	Dgkh	Cxx1b
Gm1947	Gm26214	Dhrs1	Cxx1c
Gm19489	Gm26263	Dhrs9	Cxxc5
Gm19512	Gm26264	Dhx58	Cyb5a
Gm19515	Gm26316	DLEU2_5	Cym
Gm19524	Gm26381	Dleu2|Mir16-1|Gm20034	Cyp20a1
Gm19528	Gm26391|Rn5s17	Dlgap5	Cyp27a1
Gm19545	Gm26437	Dmtf1	Cyp2ab1
Gm19551	Gm26442	Dmxl2	Cyp39a1
Gm19562	Gm26649	Dnajb14	Cysltr1
Gm19568	Gm27161	Dock5	Cyth3
Gm19592	Gm27385	Dopey2	D10Jhu81e
Gm19601	Gm27530	Dram1	D10Wsu102e
Gm19631	Gm27959	Dsn1	D130040H23Rik
Gm19645	Gm2871	Dstn	D130062J21Rik
Gm19658	Gm3362	Dtx3l	D17H6S56E-5
Gm1966	Gm3414	Dtx4	D1Ertd448e
Gm19660	Gm3466	Dubr	D2hgdh
Gm19662	Gm3571	Dusp16	D2Wsu81e
Gm19664	Gm3604	E030024N20Rik	D3Ertd254e
Gm19665	Gm4199	E130111B04Rik|RP23-398F7.6	D830031N03Rik|Macf1
Gm19687	Gm4246	E230013L22Rik	D8Ertd82e
Gm19693	Gm4532	E2f2	Dad1
Gm19703	Gm4845	E2f7	Dapl1
Gm19706	Gm4875	E2f8	Dbp
Gm19723	Gm4883	E330009J07Rik	Dbt
Gm19731	Gm4904	E330033B04Rik	Dcaf13
Gm19738	Gm4917	E430024P14Rik	Dcaf17
Gm1974	Gm5116	Eaf1	Dcaf4
Gm19763	Gm5141	Ear7|Ear6	Dcaf7
Gm19767	Gm5423	Ebi3	Dcaf8
Gm19789	Gm5435	Ect2	Dclk2
Gm19799	Gm5843	Edn1	Dcp1b
Gm19820	Gm5879	Efcab14	Dcun1d1
Gm19826	Gm5903	Egfl8	Ddb1
Gm19846	Gm6505	Egln3	Ddhd1|Mir5131
Gm19848	Gm6695	Egr4	Ddost
Gm19852	Gm6741	Ehd1	Ddrgk1
Gm19868	Gm6768	Eid3	Ddx1
Gm19876	Gm6901	Eif2ak2	Ddx10
Gm1988	Gm7265	Eif4e3	Ddx18
Gm19886	Gm7352	Elane	Ddx19a
Gm19899	Gm7584	Eldr	Ddx19b
Gm19910	Gm7855	Ell2	Ddx20
Gm19922	Gm8051	Elovl7	Ddx21
Gm19929	Gm8323	Eme1	Ddx27
Gm19933	Gm8340	Enpp5	Ddx31
Gm19941	Gm8546	Ensa	Ddx41
Gm19945	Gm8615	Entpd1	Ddx46
Gm19974	Gm8878	Entpd3	Ddx49
Gm19976	Gm9105	Epha1	Ddx51
Gm2000	Gm9159	Epx	Ddx54
Gm20010	Gm9294	Erbb2ip	Ddx56
Gm20014	Gm9575	Erg	Ddx59
Gm20022	Gm9770	Erich3	Decr1
Gm20024	Gm9938	Ero1l	Decr2
Gm20035	Gmcl1	Esco2	Dennd1a
Gm20094	Gna11	Espnl	Dennd4c
Gm20110	Gnai3	Esrra|Mir6990	Dennd5b
Gm20120	Gne	Ethe1	Dennd6a
Gm20176	Golm1	Ets2	Depdc5
Gm20181	Golph3l	Etv6	Desi2
Gm20195	Gopc	Extl2	Det1
Gm20227	Gpatch11	F10	Dexi
Gm20234	Gpatch8	F11r	Dgka
Gm20264	Gpr174	F3	Dgkd
Gm20274	Gpr18	F5	Dgke
Gm20282	Grk5	F630042J09Rik	Dgkz
Gm20285	Grsf1	F7	Dguok
Gm20402|RP24-337A16.1	Gsg2	F730016J06Rik	Dhcr24
Gm20417|RP24-458F14.3	Gstk1	F830208F22Rik	Dhcr7
Gm20470|RP24-258P4.8	Gstm4	Fabp5	Dhrs4
Gm20481	Gtf2a1	Fabp5l2	Dhx15
Gm20490|RP23-368M21.6	Gtpbp8	Fam104a	Dhx30
Gm20496|RP23-123G8.16	Gxylt1	Fam110c	Dhx33
Gm20511|RP23-341C5.10	Gypa	Fam114a1	Dhx35
Gm20531|RP24-297C1.11	Hadhb	Fam122a	Dhx37
Gm20536|RP23-335C3.6	Hba-a2|Hba-a1	Fam126b	Dhx57
Gm20559	Hba-ps4	Fam166a	Dhx9
Gm20645|RP23-164N15.3	Hbb-bs|Hbb-b1	Fam188a	Dicer1
Gm20663|RP23-466I14.1	Hbb-bt|Hbb-b2|Hbb-b1	Fam193b	Diexf
Gm20680|RP23-432N1.4	Hepacam2	Fam196b	Dimt1
Gm20682|RP23-127O4.4	Hexb	Fam209	Dip2b
Gm20721	Hfe	Fam20c	Dis3
Gm20783	Hgsnat	Fam217b	Dis3l2
Gm2174	Hhex	Fam219a	Dkc1
Gm21742	Hipk1	Fam229a	Dkkl1
Gm21748	Hist2h2be	Fam53c	Dlat
Gm21857|LOC100861837|Mid1	Hltf	Fam63a	Dmtn
Gm21860	Hn1l	Fam64a	Dmxl1
Gm21887	Hnrnpa0	Fam65b	Dnaaf2
Gm21954	Hnrnpul2	Fam83d	Dnaaf5
Gm21958	Hook1	Fanca	Dnaja2
Gm21961	Hook3	Fancd2	Dnaja3
Gm22008	Hpgd	Far2	Dnaja4
Gm22027	Hs2st1	Fas	Dnajc1
Gm22029	Hsd17b11	FAS-AS1	Dnajc15
Gm22030	Hsd17b4	Fbrs	Dnajc16
Gm22043	Hsdl1	Fbxl3	Dnajc18
Gm22048	Hsdl2	Fbxl5	Dnajc19
Gm22067	Icosl	Fbxo11	Dnajc19-ps
Gm22071	Idh1	Fbxo48	Dnajc2
Gm22077	Ids	Fbxo5	Dnajc21
Gm22091	Ifnar2	Fcer1g	Dnajc27
Gm22102	Ifngr2	Fcgr3	Dnajc7
Gm22103	Igf1	Fcgr4	Dnajc9
Gm22104	Ighg1	Fcnb	Dnase1l3
Gm22105	Ighg3	Fcor	Dntt
Gm22106	Ighv11-1	Fer	Dock10
Gm22112	Ighv11-2	Fes	Dock9
Gm22117	Ighv1-4	Ffar2	Dolk
Gm22166	Ighv14-2	Fgd4	Dph2
Gm22183	Ighv1-62-2	Fgr	Dph5
Gm22184	Ighv1-7	Fhl3	Dph6
Gm22204	Ighv1-71	Fhod1	Dph7
Gm22229	Ighv1-76	Fkbpl	Dpp4
Gm22230	Ighv1-82	Flot1	Dpy19l1
Gm22231	Ighv1-86	Flot2	Dpy19l3
Gm22232	Ighv3-3	Fmnl2	Dpysl2
Gm22234	Ighv3-4	Fmo5	Drg2
Gm22243	Ighv3-5	Fnbp1l|Mir7657	Drosha
Gm22346	Ighv6-4	Fnbp4	Dse
Gm22351|Gm15365	Ighv6-5	Fndc3b	Dtwd2
Gm22380	Ighv6-6	Fndc9	Dtx1
Gm22403	Ighv7-4	Fosl1	Dusp10
Gm22406	Ighv8-2	Fosl2	Dusp18
Gm22414	Ighv8-4	Foxd4	Dusp2
Gm22419	Ik	Foxi1	Dusp22
Gm22441	Il17ra	Foxm1|4933413G19Rik	Dusp4
Gm22455	Il6ra	Foxn2	Dusp7
Gm22461	Il9r	Fpr1	Dync1h1
Gm22463	Insr	Fpr2|Fpr3	Dyrk2
Gm22464	Ipp	Frmd8os|AC142098.4|Gm9783	Dyrk3
Gm22468	Ireb2	Fth1	Dzip1
Gm22469	Irf2bpl	Fth-ps2	E130215H24Rik
Gm22475	Itga4	Furin	E2f5
Gm22520	Itgad	Fyb	E430018J23Rik
Gm22547	Itgb5	G0s2	E430025E21Rik
Gm22565	Itgb7	G530012D18Rik	Ebag9
Gm22571	Jak2	G6bos	Ebf1
Gm22578	Jmjd4	G6pd2	Ecd
Gm22596	Kbtbd11	Gab2	Ece1
Gm22610	Kcna5	Gabbr1	Eci1
Gm22615	Kctd12|Mir5130	Gabpb1	Ecsit
Gm22616	Kdelr2	Gadd45a	Edaradd
Gm22617	Kdm2a	Gadd45b	Edem3
Gm22646	Kdm5b	Gadd45g	Eef1a1
Gm22663	Kdm7a	Galc	Eef1b2
Gm22672	Kif2a	Gale	Eef1d
Gm22678	Kif3b	Galnt3	Eef1e1
Gm22690	Klhl14	Galr1	Eef1g
Gm22706	Klhl24	Gapt	Eef2
Gm22715	Klhl42	Gas2l3	Eef2k
Gm22734	Klhl9	Gas7	Eef2kmt
Gm22735	Klkb1|Cyp4v3	Gatm	Eefsec
Gm22743	Kynu	Gbp2	Efr3a
Gm22745	L3mbtl3	Gbp2b|Gbp5	Eftud1
Gm22750	Lactb	Gbp3	Eftud2
Gm22751|Gm12164	Lair1	Gbp7	Egln1
Gm22771	Lamc1	Gca	Egr1
Gm22800	Ldah	Gch1	Ehd2
Gm22802	Lmbrd2	Gda	Ehd3
Gm22807	Lnpep	Gdap10	Ehd4
Gm22824	LOC100861712	Gdi1	Ehhadh
Gm22825	LOC100861864	Gdpd3	Ehmt2
Gm22852	LOC100862386	Gen1	Ei24
Gm22854	LOC102637418	Ggct	Eif2a
Gm22862	LOC105244763	Ggh	Eif2ak3
Gm22888	Lpar5	Ggt1	Eif2ak4
Gm22901	Lpcat1	Ggt5	Eif2b1
Gm22903	Lpin1	Gja5	Eif2b3
Gm22913	Lrig2	Gk	Eif2b4
Gm22925	Lrrc20	Glb1l	Eif2b5
Gm22930	Lrrc8b	Glipr2	Eif2s1
Gm22949	Lrrcc1	Glis3	Eif2s2
Gm22952	Ltb	Glrx	Eif2s3x
Gm22990	Ltf	Gm10087	Eif3a
Gm22991	Ltn1	Gm10101	Eif3b
Gm22992	Ly75	Gm10105	Eif3c
Gm23019	Lyst	Gm10135	Eif3d
Gm23029	Mafb	Gm10143|AC132148.3	Eif3e
Gm23049	Man1a	Gm10153	Eif3f
Gm23051	Man2a1	Gm10179	Eif3g
Gm23053	Map2k6	Gm10181	Eif3h
Gm23062	Map3k1	Gm10182	Eif3i
Gm23064	Map3k2	Gm10184	Eif3j2|Eif3j1
Gm23075	Map3k3	Gm10188	Eif3k
Gm23086	March6	Gm10197	Eif3l
Gm23087	Mavs	Gm10198	Eif3m
Gm23094	Mbnl3	Gm10217	Eif3s6-ps1
Gm2310	Mdfic	Gm10228	Eif3s6-ps2
Gm23162	Mertk	Gm10253	Eif4a3
Gm23163	Mettl14	Gm10259	Eif4b
Gm23164	Mettl18	Gm10282	Eif4g1
Gm23177	Mettl4	Gm10298	Eif5b
Gm23178	Mfap1a|Mfap1b	Gm10357	Elac2
Gm23189	Mfap1b	Gm10388	Elf1
Gm23190	Micu2	Gm10410	Elk3
Gm23209	Mir149	Gm10425	Elk4
Gm23215	Mir29a	Gm10493	Ell3
Gm23237	Mir3074-2	Gm10521	Elmo2
Gm23251	Mir378c	Gm10576	Elmod3
Gm23266	Mir3964	Gm10584	Elovl5
Gm23272	Mir466	Gm10600	Elp2
Gm23282	Mir6237	Gm10601	Elp3
Gm23288	Mir6384	Gm10616	Elp4
Gm23291	Mir6392	Gm10640	Emc1
Gm23292	Mir6541	Gm10663	Emc10
Gm23304	Mir669c	Gm10665|Gm10670	Emc6
Gm23335	Mir684-1	Gm10665|Gm10670	Eml4
Gm23368	Mir684-1	Gm10684	Eng
Gm23388	Mir684-1	Gm10693	Eno3
Gm23391	Mir684-1	Gm10791	Enpp1
Gm23400	Mir684-1	Gm10807	Entpd4
Gm23401	Mir684-1	Gm10813	Entpd4|Gm21685
Gm23415	Mir684-2	Gm10827	Entpd6
Gm23416	Mir7118	Gm10829	Eny2
Gm23425	Mir7213	Gm10865	Eogt
Gm23438	Mir7668	Gm10874	Eomes
Gm23440	Mir8091	Gm10964	Ep400
Gm23455|Gm22579	Mis12	Gm10974	Epb41
Gm23458	Mknk2	Gm10985	Epb41l4aos
Gm23463	Mkrn1	Gm11027	Epb42
Gm23487	Mkrn1-ps1	Gm11042	Ephx1
Gm23488	Mmgt1|Mir5116	Gm11060	Eprs
Gm23489	Mob3a	Gm11115	Epsti1
Gm23492	Mospd1	Gm11131|RP23-331E12.9	Erap1
Gm23550	Mphosph8	Gm11166	Ercc2|Mir343
Gm23551	Mpp5	Gm11172	Ercc4
Gm23566	Mrc1	Gm11175	Ercc6l2
Gm23569	Msantd4	Gm11186	Erdr1
Gm23606	Msh2	Gm11187|RP23-388J21.1	Ergic1
Gm23607	Msh6	Gm11200	Eri3
Gm23612	Msl1	Gm11205|RP23-97P13.1	Erlec1
Gm23617	Msl2	Gm11210|RP23-47N2.3	Ermap
Gm23620	Mtif3	Gm11212	Ero1lb
Gm23631	Mtmr1	Gm11223	Errfi1
Gm23636	Mtmr9	Gm11241	Esf1
Gm23637	Mtpn	Gm11247|RP23-236A12.1	Esyt1
Gm23646	Mtrf1l	Gm11261|RP23-189G9.1	Etaa1
Gm23666	mt-Tr	Gm11331	Etnk1
Gm23700	Mxd4	Gm11344|Gm11345|Gm11342|RP23-96E5.5|RP23-80C18.5|LOC100503456	Ets1
Gm23713	Myo1f	Gm11355	Evl
Gm23726	Myo9a	Gm11379|RP23-459H16.2	Exoc4
Gm23728	Naa30	Gm11402|RP23-198N14.4	Exosc1
Gm23729	Naaa	Gm11424	Exosc10
Gm23749	Naif1	Gm11427	Exosc2
Gm23766	Narf	Gm11439	Exosc3
Gm23775	Nbeal1	Gm11440	Exosc5
Gm23785	Nck1	Gm11460	Exosc8
Gm23798	Ndst1	Gm11499|RP23-149O19.1	Ext1
Gm23801	Nedd4	Gm11505|RP23-449P23.6	Ext2
Gm23802	Nfam1	Gm11520|RP23-265A5.4	Extl3
Gm23810	Ngp	Gm11537|RP23-196B19.3	Eya1
Gm23842	Nicn1	Gm11542|RP23-290B5.7	Eya2
Gm23844	Nid1	Gm11555	F2r
Gm23851	Nin	Gm11564	F2rl1
Gm23876	Nipal3	Gm11574|RP23-428N4.7	Faah
Gm23879	Nipbl	Gm11618	Fads1
Gm23881	Nkap	Gm11685|RP23-80J21.1	Fads2
Gm23882	Nlrp10	Gm11697|RP23-102B2.2	Fah
Gm2389	Nod1	Gm11698	Faim
Gm2391	Notch2	Gm11702	Fam102a
Gm23913	Noxred1	Gm11706|RP23-170A23.2	Fam105a
Gm23914	Npc1	Gm11714	Fam117a
Gm23937	Nr3c1	Gm11715|RP23-317F9.4	Fam120a
Gm23943	n-R5s1	Gm11723|RP23-151N19.4	Fam120c
Gm23961	n-R5s100	Gm11795|RP23-222A18.2	Fam129c
Gm23963	n-R5s101	Gm11804	Fam132a
Gm23965	n-R5s102	Gm11805	Fam134c
Gm23976	n-R5s103	Gm11815|RP23-172G14.2	Fam167a
Gm23990	n-R5s104	Gm11827	Fam168b
Gm23992	n-R5s105	Gm11836	Fam169b
Gm24026	n-R5s106	Gm11851|RP23-323E6.1	Fam172a
Gm24053	n-R5s107	Gm11853	Fam174b
Gm24054	n-R5s108	Gm11863|RP23-415F19.1	Fam175a
Gm24060	n-R5s109	Gm11865	Fam178a
Gm24078	n-R5s110	Gm11873	Fam179b
Gm24092	n-R5s111	Gm11883|RP23-25B10.2	Fam185a
Gm24093	n-R5s112	Gm11886|RP23-335F19.1	Fam189b
Gm24095	n-R5s113	Gm11887|RP23-335F19.2	Fam204a
Gm24098	n-R5s114	Gm11900|RP23-86J22.3	Fam206a
Gm24112	n-R5s115	Gm11916|RP23-200B23.2	Fam208a
Gm24127	n-R5s117	Gm11941	Fam208b
Gm24132	n-R5s118	Gm11951	Fam210b
Gm24135	n-R5s119	Gm11995|RP23-138G17.1	Fam213a
Gm24141	n-R5s12	Gm12000|RP23-373H2.4	Fam214a
Gm24145	n-R5s120	Gm12004	Fam220a
Gm24148	n-R5s121	Gm12022|RP23-436D9.1	Fam220-ps
Gm24157	n-R5s122	Gm12063|RP23-42P24.6	Fam234b
Gm24159	n-R5s123	Gm12107|RP23-186D6.2	Fam35a
Gm24161	n-R5s124	Gm12127|RP23-41F14.2	Fam3c
Gm24193	n-R5s125	Gm12168	Fam43a
Gm24263	n-R5s127	Gm12188	Fam49a
Gm2427	n-R5s128	Gm12196	Fam53a
Gm24279	n-R5s129	Gm12197|RP23-121P11.4	Fam53b
Gm24290	n-R5s13	Gm12204|RP23-263C23.4	Fam58b
Gm24302	n-R5s130	Gm12208	Fam60a
Gm24307	n-R5s131	Gm12213	Fam69a
Gm2431	n-R5s133	Gm12250	Fam73a
Gm24313	n-R5s134	Gm12256|RP23-419P16.11	Fam78a
Gm24323	n-R5s136	Gm12260	Fam92a
Gm24328	n-R5s138	Gm12263	Fam98a
Gm24331	n-R5s139	Gm12276	Fancl
Gm24332	n-R5s141	Gm12280|RP23-234K24.6	Fancm
Gm24339	n-R5s142	Gm12314	Fars2
Gm24342	n-R5s143	Gm12316|RP23-122P1.7	Farsa
Gm24350	n-R5s144	Gm12329	Farsb
Gm24357	n-R5s146	Gm12344	Fasl
Gm24366	n-R5s149	Gm12387	Fasn
Gm24369	n-R5s151	Gm12395|RP23-411B7.3	Fastkd2
Gm24370	n-R5s152	Gm12398|RP23-304H5.2	Fbl
Gm24387	n-R5s156	Gm12402	Fbxo21
Gm24390	n-R5s161	Gm12407|Ccl19	Fbxo22
Gm24396	n-R5s162	Gm12424	Fbxo25
Gm24397	n-R5s165	Gm12431	Fbxo31
Gm24399	n-R5s168	Gm12437|RP23-141C15.4	Fbxo32
Gm24412	n-R5s170	Gm12440|RP23-265O19.2	Fbxo4
Gm24427	n-R5s173	Gm12450|RP23-154F2.1	Fbxo7
Gm24433	n-R5s175	Gm12454	Fbxo8
Gm24441	n-R5s176	Gm12489	Fcer2a
Gm24484	n-R5s182	Gm12521|RP23-316M11.3	Fcgrt
Gm24485	n-R5s187	Gm12573	Fcho1
Gm24488	n-R5s193	Gm12590|RP23-342H16.5	Fchsd2
Gm24510	n-R5s194	Gm12651|RP23-3E2.2	Fcmr
Gm24520	n-R5s195	Gm12652|RP23-66O9.1	Fcrl1
Gm24539	n-R5s196	Gm12663	Fcrl5
Gm24555	n-R5s2	Gm12708|RP23-77I17.3	Fcrla
Gm24556	n-R5s204	Gm12781|RP23-324J22.3	Fech
Gm24557	n-R5s209	Gm12792	Fem1a
Gm24567	n-R5s210	Gm12812|RP23-200O20.1	Fgd2
Gm24586	n-R5s211	Gm12828|RP23-411H13.1	Fgf13
Gm24587	n-R5s213	Gm12833	Fh1
Gm24603	n-R5s220	Gm12840|RP23-99G21.3	Fhdc1
Gm24604	n-R5s25	Gm12841|RP23-133J9.5	Fkbp1a
Gm24608	n-R5s28	Gm12856	Fkbp3
Gm24611	n-R5s3	Gm12858	Fkbp4
Gm24613	n-R5s33	Gm12862|RP23-228G24.4	Flnb
Gm24617	n-R5s41	Gm12867|RP23-344D2.3	Flt1
Gm24643	n-R5s46	Gm12868|RP23-344D2.4	Flt3
Gm24644	n-R5s56	Gm12891	Fn1
Gm24671	n-R5s58	Gm12919	Fn3krp
Gm24683	n-R5s60	Gm12957	Fntb
Gm24689	n-R5s62	Gm12993	Focad
Gm24710	n-R5s64	Gm13008|RP23-161N17.13	Foxj1|Rnf157
Gm24744	n-R5s71	Gm13018|RP23-416J8.1	Foxn3
Gm24761	n-R5s77	Gm13044|RP23-58H5.7	Foxo1
Gm24766	n-R5s88	Gm13065	Foxp1
Gm24769	n-R5s93	Gm13097|RP23-173D8.8	Frat2
Gm24795	n-R5s96	Gm13113|RP23-15L19.1	Frmd4b
Gm24802	Nrm	Gm13160	Fryl
Gm24811	Nrp2	Gm13167	Fto
Gm24834	Nsd1	Gm13176	Ftsj3
Gm24876	Nucb2	Gm13184|RP23-167G19.8	FTX_1
Gm24958	Nucks1	Gm13201|RP23-139J21.5	Fubp1
Gm24972	Nxpe3	Gm13205|RP23-230I5.2	Fundc2
Gm24973	Olfr1036	Gm13224	Fut11
Gm24975	Olfr1162	Gm13232	Fut4
Gm24981	Olfr1450	Gm13237	Fxn
Gm24989	Olfr985	Gm13303	Fyn
Gm24996	Oosp1	Gm13307|RP23-304I1.4	G3bp1
Gm24999	Ormdl1	Gm13310	G430095P16Rik
Gm25000	Osbp	Gm13338	G6pc3
Gm25003	Osbpl11	Gm13345	Gaa
Gm25019	Osbpl8	Gm13371|RP23-475B13.4	Gab1
Gm25033	Otud7b	Gm13392	Gadd45gip1
Gm25035	Pak2	Gm13393|RP23-426D2.4	Galnt1
Gm25040	Pank1	Gm13402|RP23-104G16.3	Galnt10
Gm25042	Pank3	Gm13420|RP23-304D11.2	Galnt11
Gm25062	Papola	Gm13431	Galnt12
Gm25063	Papss1	Gm13453	Galnt6
Gm25069	Paqr9	Gm13468|RP23-103G12.1	Galnt7
Gm25070	Parp1|Mir6904	Gm13477	Ganc
Gm25071	Pbrm1	Gm13489	Gars
Gm25084	Pcmtd1	Gm13495	Gata1
Gm25100	Pcmtd2	Gm13519|RP23-35D6.1	Gata3|9230102O04Rik
Gm25108	Pcyox1	Gm13527	Gatc
Gm25110	Pdcd7	Gm13549	Gatsl2
Gm25123	Pde2a	Gm13555	Gbp10|Gbp6
Gm25148	Pdpr	Gm13556|RP23-399K8.2	Gbp4
Gm25166	Peak1	Gm13562|RP23-306D20.5	Gbp8
Gm25171	Peg13	Gm13563|RP23-306D20.7	Gclc
Gm25208	Pgap1	Gm13574	Gcn1l1|Mir7029
Gm25219	Pgm2	Gm13580	Gcsh
Gm25227	Phax	Gm13609|RP23-55I14.7	Gdf11
Gm25228	Phxr2	Gm13656|RP23-374O4.4	Gdpgp1
Gm25233	Pigv	Gm13657|RP23-374O4.5	Gem
Gm25249	Pik3cg	Gm13667|RP23-238A18.2	Gemin5
Gm25250	Pik3r1	Gm13669	Gfer
Gm25270	Pilrb2	Gm13670	Gfi1b
Gm25281	Pip4k2b	Gm13681	Gfm1
Gm25290	Pja2	Gm13684|RP23-141N19.2	Gfra2
Gm25297	Pla2g15	Gm13685	Gga2
Gm25299	Plcg1	Gm13701|RP23-202M10.1	Ggact
Gm25332	Plekhb2	Gm13748|RP23-45M23.1	Gid4
Gm25347	Plpp6	Gm13765|RP23-309M6.3	Gimap1
Gm25353	Polr2a	Gm13767	Gimap1os|RP23-118E20.5|Gm3345
Gm25355	Polr2b	Gm13768	Gimap3
Gm25361	Pomk	Gm13797	Gimap4
Gm25381	Ppm1b	Gm13800|RP23-246E11.1	Gimap5
Gm25406	Ppp1r12a	Gm13805|RP23-392O16.1	Gimap6
Gm25424	Ppp1r21	Gm13810	Gimap7
Gm25432	Ppp2r5a	Gm13813	Gimap8
Gm25437	Pptc7	Gm13822|RP24-297N9.6	Gimap9
Gm25458	Pqlc2	Gm13828	Git1
Gm25483	Prcp	Gm13833|RP23-459L15.2	Glcci1
Gm25508	Prf1	Gm13840|RP23-228F6.3	Glg1
Gm25510	Prkacb	Gm13877	Glmn
Gm25529	Prkar2a	Gm13898	Glo1
Gm25541	Prkd2	Gm13930	Glrx3|Gm12669
Gm25544	Prob1	Gm13977|RP23-158F12.2	Glrx5
Gm25567	Prpf6	Gm13989|RP23-169H17.1	Gltp
Gm25568	Prps2	Gm13998	Gltscr1l
Gm25570	Psd4	Gm13999|RP23-383I16.3	Gltscr2
Gm25571	Ptbp3	Gm14005	Glud1|Gm3219
Gm25591	Ptcd2	Gm14008	Gm10020
Gm25654	Pten	Gm14010|RP23-259N17.1	Gm10029
Gm25665	Ptpn14	Gm14019|RP23-328F20.2	Gm10036
Gm25693	Ptpn9	Gm14023	Gm10039
Gm25701	Purb	Gm14028	Gm10045
Gm25706	Pxmp4	Gm14043|RP23-358G23.3	Gm10059
Gm25708	Pygb	Gm14060|RP23-181O3.2	Gm10064
Gm2573	Qser1	Gm14063|RP23-109J20.1	Gm10071
Gm25736	Rab10	Gm14069	Gm10073
Gm25738	Rab21	Gm14079|RP23-139H14.3	Gm10076
Gm25748	Rab39	Gm14087|RP23-158L6.1	Gm10086
Gm25754	Rab43	Gm14133	Gm10088
Gm25767	Rab5b	Gm14142	Gm10110
Gm25774	Rab6b	Gm14145|RP23-283M2.2	Gm10126
Gm25775	Rabac1	Gm14154|RP23-214I20.3	Gm10130
Gm25778	Rad1	Gm14163	Gm10131
Gm25787	Rad50	Gm14182	Gm10132
Gm25817	Rala	Gm14190	Gm10136
Gm25847	Ralbp1	Gm14193	Gm10139
Gm25850	Ralgapb	Gm14210|RP23-132B12.2	Gm10146
Gm25872	Rap1gds1	Gm14219	Gm10154
Gm25892	Rassf3	Gm14242|RP23-480D17.2	Gm10155
Gm25931	Rassf4	Gm14253	Gm10161
Gm25959	Rbl2	Gm14265|RP23-161B3.4	Gm10163
Gm25972	Rdh12	Gm14286|RP23-169M4.4	Gm10169
Gm25973	Rdh14	Gm14293	Gm10175
Gm25974	Rest	Gm14317|RP23-140D14.14	Gm10180
Gm25992	Rev3l	Gm14328	Gm10193
Gm25996	Rfc1	Gm14371	Gm10222
Gm25997	Rgmb	Gm14382	Gm10224
Gm26043	Rhag	Gm14396|RP23-313J15.11	Gm10231
Gm26050	Rhoq	Gm14467|RP23-220K22.3	Gm10240
Gm26051	Rmnd5a	Gm14483|Gm14477|Gm14476|Gm14479|Gm14475	Gm10243
Gm26052	Rn5s	Gm14483|Gm14477|Gm14476|Gm14479|Gm14482|Gm14475	Gm10247
Gm26053	Rnase6	Gm14493|Gm10489|RP23-130J1.4	Gm10260
Gm26070	Rnf13	Gm14504	Gm10263
Gm26092	Rnf144a	Gm14524	Gm10268
Gm26119	Rnu2-10	Gm14537	Gm10269
Gm26137	Rnu3a	Gm14548|Pira11|Pira2|Pira4|Pira7	Gm10273
Gm26148	Rnu73b	Gm14581	Gm10275
Gm26154	Rny3	Gm14604|RP23-260P9.1	Gm10288
Gm26158	Rock1	Gm14636	Gm10305
Gm26172	Rock2	Gm14646|RP23-44A17.1	Gm10312
Gm26190	Rp9	Gm14654	Gm10330|LOC100861601
Gm26195	Rpl30-ps11	Gm14658|RP23-226L1.2	Gm10335
Gm26231	Rpl3-ps1	Gm14672|RP23-302D20.1	Gm10336
Gm26235	Rpl3-ps2	Gm14675|RP23-322K21.4	Gm10343
Gm26241	Rpl9-ps1	Gm14689|RP23-24K4.2	Gm10356
Gm26248	Rps6ka1	Gm14693|RP23-24K4.3	Gm10416
Gm26258	Rps6ka3	Gm14699	Gm10420
Gm26259	Rps6ka5	Gm14700	Gm10443
Gm26265	Rras2	Gm14702	Gm10509
Gm26302	Rspry1	Gm14703|RP23-54C14.5	Gm10667
Gm26303	Rubcn	Gm14708|RP23-224M8.3	Gm10689
Gm26368	S1pr4	Gm14734|RP23-272G10.3	Gm10704
Gm26386	Sbk1	Gm14737|RP23-461P10.1	Gm10715
Gm26408	Scarna8	Gm14749	Gm10717
Gm26415	Scd2|Mir5114	Gm14753	Gm10718|Gm10722
Gm26431	Scimp	Gm14763|RP23-311G7.2	Gm10719
Gm26440	Sdha	Gm14778|RP23-335N15.2	Gm10720
Gm26463	Sec23a	Gm14789|RP23-57I15.2	Gm10721
Gm26469	Sec23ip	Gm14801|RP23-418O17.1	Gm10736
Gm26472	Sel1l	Gm14806	Gm10752
Gm26475	Sema4b	Gm14814|RP23-437A4.2	Gm10770
Gm26518	Serinc5	Gm14829	Gm10772
Gm26522	Serpine2	Gm14868	Gm10777
Gm26527	Sesn1	Gm14888|RP23-150G4.2	Gm10778
Gm26561	Setx	Gm14889|RP23-303A21.2	Gm10800
Gm26566	Sft2d3	Gm14904	Gm10801
Gm26581|RP23-58L22.8	Sgsh	Gm14910	Gm10819
Gm26632|RP23-4F1.5	Shoc2	Gm14926	Gm10913
Gm26638|RP23-271G7.2	Shprh	Gm14941|RP23-74L11.2	Gm10914
Gm26668	Siae	Gm14969|RP23-318H22.2	Gm10916
Gm26669	Siglech	Gm14996	Gm10923
Gm26699	Sirpa	Gm14998	Gm11168
Gm26740|RP24-547D11.2	Ska2	Gm15046|RP23-305F20.1	Gm11196
Gm26750	Slc12a2	Gm15049	Gm11199
Gm26767	Slc15a4	Gm15064|RP23-235P16.1	Gm11227
Gm26778	Slc16a10	Gm15116	Gm11249
Gm26804	Slc25a11	Gm15133	Gm11253
Gm26809	Slc25a24	Gm15135|AC123830.11	Gm11263
Gm26818	Slc26a2	Gm15145|RP23-228N14.5	Gm11270
Gm26825	Slc2a3	Gm15146|RP23-228N14.2	Gm11271
Gm26826	Slc35a5	Gm15181	Gm11281
Gm26827	Slc35b4	Gm15195	Gm11295
Gm26853	Slc39a10	Gm15272	Gm11307
Gm26857	Slc40a1	Gm15283|RP24-103K4.2	Gm11313
Gm26860	Slc41a2	Gm15298|RP23-232B3.4	Gm11334
Gm26870	Slc44a1	Gm15347|AC134581.2	Gm11341
Gm26880	Slc4a1	Gm15354	Gm11343
Gm26899	Slc6a6	Gm15356|AC122800.3	Gm11353
Gm26904	Slc7a8	Gm15366	Gm11361
Gm26905	Slc9a6	Gm15374	Gm11362|Gm8964
Gm26951|RP23-114E15.10	Slc9a7	Gm15384|RP23-252K7.9	Gm11363
Gm27149	Slc9a9	Gm15402|RP23-335C3.3	Gm11380
Gm27166|RP24-86O15.2	Slfn14	Gm15405|RP23-75D10.1	Gm11383
Gm27219	Slk	Gm15428	Gm11400
Gm27240|RP23-93M1.3	Smc3	Gm15432	Gm11407
Gm27241|RP23-296I6.3	Smc6	Gm15440	Gm11410
Gm27341	Smim15	Gm15448	Gm11425
Gm27342	Smpd1	Gm15452	Gm11443
Gm27361	Smurf1	Gm15487|Atp6v0c	Gm11449
Gm27375	Smurf2	Gm15521|RP23-96M8.1	Gm11450
Gm27387	Snora16a	Gm15532	Gm11456
Gm27397	Snora21	Gm15534	Gm11472
Gm27415	Snora30	Gm15551|AC110174.1	Gm11473
Gm27430	Snora31	Gm15563|RP24-407J14.1	Gm11478
Gm27437	Snora34|Mir1291	Gm15574	Gm11509
Gm27440	Snora36b|Mir664	Gm15612	Gm11510
Gm27450	Snora47	Gm15627|AC157587.1	Gm11512
Gm27459	Snora69	Gm15628	Gm11516
Gm27490	Snord104	Gm15629|RP24-510A3.2	Gm11531
Gm27501	Snord110	Gm15662	Gm11533
Gm27509	Snord118	Gm15666	Gm11539
Gm27525	Snord123	Gm15684|AC163442.3	Gm11560
Gm27607	Snord17	Gm15693	Gm11599
Gm27616	Snord35b	Gm15722|AC116764.4	Gm11604
Gm27628	Snord45b	Gm15724|RP23-246B24.3	Gm11631
Gm27649	Snord58b	Gm15755|RP23-378H5.5	Gm11643
Gm27702	Snord58b	Gm15758|AC109200.1	Gm11663
Gm27704	Snord61	Gm15787	Gm11675
Gm27731	Snord70	Gm15819|AC158789.2	Gm11687
Gm27742	Snord71	Gm15820	Gm11688
Gm27828	Snord72	Gm15821	Gm11690|RP23-197C15.1
Gm27839	Snord73a	Gm15841|AC139023.4	Gm11695|RP23-392H19.5
Gm27847	Snord85	Gm15856|RP23-27C9.2	Gm11703
Gm27892	Snord87	Gm15862|RP23-114E15.9	Gm11759
Gm27910	Snord89	Gm15868|RP24-85F23.4	Gm11760
Gm27989	Snord90	Gm15872|RP23-282D4.2	Gm11765
Gm28019	Snord91a	Gm15886|AC132567.2	Gm11793
Gm2840	Snord92	Gm15925	Gm11799
Gm2991	Snx13	Gm15928	Gm11808
Gm3227	Snx14	Gm15929|AC130680.15	Gm11810
Gm3233	Snx19	Gm15930	Gm11822
Gm3238	Soat1	Gm15964	Gm11824
Gm3250	Sort1	Gm16016	Gm11826
Gm3331|RP23-93M1.2	Sp3	Gm16025|AC167036.6	Gm11839
Gm3435	Spast	Gm16033|Gm16034|RP23-29H5.7|RP23-29H5.6	Gm11841
Gm3531	Spib	Gm1604b|Gm1604A	Gm11843
Gm3625	Spta1	Gm16058|AC122221.2	Gm11847
Gm3873	Sptan1	Gm16059	Gm11849
Gm4184	Sptb	Gm16066|AC133523.2	Gm11852
Gm4279|RP23-207P21.2	Srgap3	Gm16100	Gm11860
Gm4342	Srp54a	Gm16104|AC155937.7	Gm11877
Gm4540	Srp54b|Srp54a	Gm16116|AC110576.2	Gm11878
Gm4559	Srp54b|Srp54c	Gm16141	Gm11893
Gm4899	Srp68	Gm16144	Gm11912
Gm4919	Ssh1	Gm16161|AC155287.2	Gm11913
Gm4955	St3gal1	Gm16166	Gm11914
Gm5228	St3gal2	Gm16172|RP23-146P7.2	Gm11927
Gm5530	St8sia4	Gm16174|AC149085.3	Gm11942
Gm5566	St8sia6	Gm16179	Gm11950
Gm5582	Stk26	Gm16181	Gm11955
Gm5591	Stom	Gm16192|AC116511.5	Gm11970
Gm5617	Strn	Gm16193|AC156554.1	Gm11972
Gm5644	Stx6	Gm16194|RP23-73N16.7	Gm11975
Gm5728|Gm8660	Stxbp3-ps	Gm16199	Gm11979
Gm5728|Gm8660	Suox	Gm16205	Gm11989
Gm5844	Suz12	Gm16211|RP23-282C23.8	Gm11998|RP23-3J16.1
Gm5943	Syap1	Gm16214|RP23-364M24.2	Gm12005
Gm6054	Sypl	Gm16236	Gm12009
Gm6055	Syt11	Gm16240|RP23-358M4.4	Gm12013
Gm614	Taco1	Gm16262|RP23-106P6.1	Gm12025
Gm6166	Tal2	Gm16282|AC164564.8	Gm12034
Gm6264	Taldo1	Gm16337|AC129945.2	Gm12035
Gm6293	Taok1	Gm16353	Gm12038
Gm6373	Tbc1d8b	Gm16355	Gm12047
Gm6377	Tbc1d9	Gm16367	Gm12058
Gm6462	Tbck	Gm16367	Gm12074
Gm6485	Tbxa2r	Gm16367|Gm16513|Gm3183	Gm12090
Gm6568	Terf1	Gm16436	Gm12091
Gm6580	Terf2ip	Gm16464	Gm12094
Gm6612	Tfdp2	Gm16487	Gm12098
Gm6904	Tgfbi	Gm16494	Gm12109
Gm6964	Thap11	Gm16501|Gm6026	Gm12110
Gm7083	Thap2	Gm16501|Gm6026	Gm12123
Gm7137	Tln1	Gm16531	Gm12129
Gm7160	Tlr1	Gm16548	Gm12138
Gm7278	Tlr4	Gm16549|RP23-397K12.1	Gm12141|Hspd1-ps3
Gm7281	Tlr6	Gm16556|RP24-483K3.7	Gm12155
Gm7334	Tm9sf2	Gm16559|RP23-463H24.2	Gm12161
Gm7367	Tm9sf3	Gm16572|RP23-315C11.3	Gm12174
Gm7609	Tmcc2	Gm16573|RP23-121M22.3	Gm12176
Gm7735	Tmem106b	Gm16575|RP23-379H6.2	Gm12191
Gm7851	Tmem106c	Gm16576	Gm12193
Gm7901|Gm5847	Tmem115	Gm16578|RP23-25E6.2	Gm12229
Gm7971	Tmem126b	Gm16587|RP23-202J6.2	Gm12242
Gm7984	Tmem168	Gm16617	Gm12251
Gm8069	Tmem170	Gm16712	Gm12254
Gm8192	Tmem173	Gm16755	Gm12267
Gm8221	Tmem18	Gm16894	Gm12269
Gm8355	Tmem206	Gm16973	Gm12291
Gm8369	Tmem254b|Tmem254c|Tmem254a	Gm17017|AC147806.8	Gm12322
Gm8444	Tmem254b|Tmem254c|Tmem254a	Gm17034|RP24-356D15.2	Gm12340
Gm8783	Tmem254b|Tmem254c|Tmem254a	Gm17035|RP23-19C9.2	Gm12341
Gm8865	Tmem30a	Gm17041|RP23-115A1.10	Gm12346
Gm8979|Gm8989	Tmem43	Gm17056|RP24-234D9.2	Gm12366
Gm8982	Tmem57	Gm17089|RP23-110A19.2	Gm12380
Gm8995	Tmod3	Gm17098|RP24-132F22.3	Gm12397
Gm9047	Tmppe|Glb1	Gm17099|RP23-284E19.7	Gm12411
Gm9089	Tmx3	Gm17122|RP24-555M20.2|LOC100861858	Gm12412
Gm9115	Tnfaip8l2	Gm17133|RP23-375G9.2	Gm12418
Gm9178	Tnfrsf13b	Gm17137	Gm12421
Gm9308	Tnfrsf18	Gm17139|RP23-107N10.4	Gm12422
Gm9340	Tnks	Gm17149	Gm12435
Gm9386	Tnpo1	Gm17151|RP24-121A12.3	Gm12444
Gm9432	Top2b	Gm17173|RP23-13H15.3	Gm12447
Gm9436	Traf2	Gm17195	Gm12458
Gm9507	Traj1	Gm17201|CT7-BM104O10.3	Gm12460
Gm9725|AC087115.1	Traj14	Gm17218|RP23-170E7.3	Gm12466
Gm9736	Traj54	Gm17268	Gm12468
Gm9761	Traj8	Gm17275	Gm12469
Gm9779	Trak2	Gm17334	Gm12470
Gm9800	Tram1	Gm17344|RP23-297H3.1	Gm12482
Gm9818	Trappc1	Gm17349	Gm12502
Gm9823	Trappc11	Gm17376	Gm12508
Gm9844	Trf	Gm17414|RP24-443D19.7	Gm12516
Gm9929|RP23-358M7.2	Trim35	Gm17435	Gm12517
Gm9948	Trim36	Gm17477|RP24-63G9.2	Gm12579
Gngt2	Trip12	Gm17552	Gm12583
Gnl3|Snord19	Tshz1	Gm17571	Gm12599
Got1	Tspan15	Gm17581	Gm12612
Gpr171	Tspyl1	Gm17604	Gm12618
Gpr183	Tstd3	Gm17619	Gm12620
Gpr4	Ttc38	Gm17651	Gm12623
Gpr84	Ttc9c	Gm18486	Gm12626
Gprc5a	Tug1	Gm18953	Gm12630
Gramd1a	Txndc15	Gm19279	Gm12643
Gramd3	Tyw1	Gm19295	Gm12666
Grasp	Ube2h	Gm19316	Gm12669
Gtf2a2	Ube3a	Gm19322	Gm12686
Gtpbp2	Ubiad1	Gm19328	Gm12693
Gvin1|Gm4070	Uchl5	Gm19333	Gm12704
Gvin1|Gm4070|Gm17757|Gm18853	Ugp2	Gm19344	Gm12712
H2-Aa	Uhmk1	Gm19369	Gm12723
H2afx	Ulk2	Gm19383	Gm12726
H2-T10	Upf3b	Gm19412	Gm12732
H2-T24	Usp32	Gm19447	Gm12733
H3f3c	Usp47	Gm19463	Gm12734
Haus2	Usp9x	Gm19474	Gm12739
Havcr1	Utrn	Gm19510	Gm12741
Hcar2	Vapa	Gm19524	Gm12757
Hdac10	Vcam1	Gm19528	Gm12760
Hdc	Vcp	Gm19545	Gm12778
Helz2	Vcp-rs	Gm19595	Gm12787
Herc6	Vdac3-ps1	Gm19609	Gm12795
Hist1h2bb	Vps13a	Gm19615	Gm12816
Hmga2-ps1	Vps33a	Gm19645	Gm12818
Hmgb2	Vps41	Gm19657	Gm12838
Hsf1	Wapl	Gm19658	Gm12846
Hsp25-ps1	Wbp4	Gm1966	Gm12848
Hsp90aa1	Wdfy2|Mir8098	Gm19660	Gm12852
Hsp90ab1	Wdr6	Gm19684|EG547347	Gm12859
Hspa1a	Wdr92	Gm19693	Gm12892
Hspa1b|Hspa1a	Wrn	Gm19705	Gm12900
Hspa5	Wwp1	Gm19719	Gm12901
Hspa8|Snord14d|Snord14e|Snord14c	Xkrx	Gm1972	Gm12902
Hspb1	Xpa	Gm19725	Gm12912
Hspe1	Xpr1	Gm19731	Gm12918
Hspe1-ps2	Zadh2	Gm19738	Gm12922
Hspe1-ps3	Zbtb24	Gm19750	Gm12928
Hspe1-ps5	Zbtb3	Gm19753	Gm12929
Hspe1-ps6	Zbtb33	Gm19763	Gm12933
Hsph1	Zbtb4	Gm19767	Gm12936
Htra4	Zc3h6	Gm19794	Gm12943
Icam1	Zf12	Gm19800	Gm12944
Idnk	Zfp113	Gm19820	Gm12947
Ier3	Zfp119b	Gm19826	Gm12959
Ifi202b|Ifi205	Zfp120	Gm19868	Gm12960
Ifi203	Zfp125	Gm19909	Gm12967
Ifi204	Zfp251	Gm19918	Gm12987
Ifi27	Zfp273	Gm19922	Gm12988
Ifi27l2a	Zfp292	Gm19923	Gm12990
Ifi35	Zfp324	Gm19933	Gm12991
Ifi44	Zfp418	Gm19934	Gm13012
Ifih1	Zfp433	Gm19941	Gm13015
Ifit1	Zfp433	Gm19945	Gm13035
Ifit1bl1	Zfp442	Gm19973	Gm13039
Ifit1bl2	Zfp459	Gm19976	Gm13047
Ifit2	Zfp518a|Mir8092	Gm20010	Gm13050
Ifit3	Zfp563	Gm20014	Gm13071
Ifit3b	Zfp58	Gm20024	Gm13091|RP23-35A4.1
Ifitm1	Zfp595	Gm20035	Gm13092
Ifitm2	Zfp65	Gm20073	Gm13094
Ifitm3	Zfp708|Rslcan18	Gm20100	Gm13123
Ifrd1	Zfp709	Gm20101	Gm13136
Ifrd2	Zfp712	Gm20120	Gm13137
Igflr1|U2af1l4	Zfp72	Gm20155	Gm13140
Ighv1-13	Zfp729a	Gm20176	Gm13141
Igkv8-23-1	Zfp729b	Gm20186	Gm13144
Igsf6	Zfp738	Gm20205	Gm13149
Igtp	Zfp740	Gm20227	Gm13156
Il10	Zfp748	Gm20234	Gm13163
Il1a	Zfp758	Gm20235	Gm13182
Il1b	Zfp759	Gm20236	Gm13192
Il1f9	Zfp773	Gm20242	Gm13194
Il1r2	Zfp790	Gm20260	Gm13196
Il1rn	Zfp799	Gm20266	Gm13204
Il27	Zfp809	Gm20282	Gm13213
Il2ra	Zfp825	Gm20285	Gm13215
Iltifb	Zfp84	Gm20290	Gm13216
Impact	Zfp85	Gm20296	Gm13229
Ino80e	Zfp87	Gm20299	Gm13231
Irak1bp1	Zfp870	Gm20317	Gm13246
Irf1	Zfp871	Gm20333	Gm13249
Irf4	Zfp873	Gm20337	Gm13268
Irf7	Zfp874b	Gm20343	Gm13294
Irf9	Zfp931	Gm2036	Gm13311
Irg1	Zfp935	Gm20379	Gm13316
Irgm1	Zfp937	Gm20399	Gm13328
Irgm2	Zfp943	Gm20400|RP24-323I5.2	Gm13339
Irs2	Zfp949	Gm20412|RP23-396G1.3	Gm13340
Isca2	Zfp953|ZFP953	Gm20417|RP24-458F14.3	Gm13341
Isg15	Zfp955a	Gm20463|RP23-24A13.20	Gm13351
Isg20	Zfp955b	Gm20470|RP24-258P4.8	Gm13370
Jak3|Insl3	Zfp958	Gm20485|RP24-498F17.1	Gm13397
Jun	Zfp963|Zfp866	Gm20496|RP23-123G8.16	Gm13407
Jund	Zfyve16	Gm20511|RP23-341C5.10	Gm13408
Kat2b-ps	Zkscan8	Gm20522|RP23-115O3.18	Gm13413
Kcnh4	Zmpste24	Gm20528|RP23-324B17.1	Gm13422
Kcnj14	Zmym2	Gm20530	Gm13436
Kdm6b	Zmym4	Gm20531|RP24-297C1.11	Gm13443
Kdm6bos|RP23-5O23.6	Znrf2	Gm20534	Gm13445
Klf2	Zswim3	Gm20536|RP23-335C3.6	Gm13456
Klf4	Zxdb	Gm20540|RP23-127F20.2	Gm13478
Klf6	Zyg11b	Gm20548|WI1-1377A22.2	Gm13487
Klf9		Gm20559	Gm13498
Klhl17|Mir7658		Gm20628|RP24-201C14.10	Gm13504
Kprp		Gm20645|RP23-164N15.3	Gm13518
Krtap5-1		Gm20650|RP23-142A14.2	Gm13525
Krtap5-2		Gm20663|RP23-466I14.1	Gm13532
Krtap5-3		Gm20667|RP23-358B23.3	Gm13534
Krtap6-3		Gm20689	Gm13545
Krtap9-1		Gm20717|RP23-133P6.2	Gm13551
Lacc1		Gm20721	Gm13552
Lcn2		Gm20735	Gm13559
Leng8		Gm21057	Gm13573
Lgals3bp		Gm21188	Gm13586
Lgals9		Gm21370	Gm13588
Lilr4b		Gm21798	Gm13602
Lilrb4a		Gm21830	Gm13603
Litaf|Gm19955		Gm21958	Gm13604
Lncpint		Gm21961	Gm13607
LOC100503176		Gm22005	Gm13611
LOC100503279		Gm22008	Gm13622
LOC100503824		Gm22015	Gm13623
LOC100504971		Gm22030	Gm13641
LOC100505062		Gm22033	Gm13642
LOC100861628		Gm22039	Gm13650
LOC100861632		Gm22048	Gm13653
LOC100861633		Gm22064	Gm13665
LOC100861639		Gm22065	Gm13666
LOC100861642		Gm22066	Gm13674
LOC100861649		Gm22071	Gm13680
LOC100861682		Gm22101	Gm13688
LOC100861684		Gm22104	Gm13690
LOC100861697		Gm22108	Gm13691
LOC100861706		Gm22117	Gm13693
LOC100861729		Gm22120	Gm13694
LOC100861732		Gm22151	Gm13695
LOC100861758		Gm22157	Gm13696
LOC100861762		Gm22171	Gm13697
LOC100861776		Gm22184	Gm13698
LOC100861787		Gm22189	Gm13708|RP23-325P5.1
LOC100861796		Gm22190	Gm13740
LOC100861804		Gm22191	Gm13755
LOC100861805		Gm22196	Gm13776
LOC100861809		Gm22210	Gm13777
LOC100861829		Gm22211	Gm13798
LOC100861831		Gm22212	Gm13804
LOC100861832		Gm22224	Gm13815
LOC100861856		Gm22230	Gm13818
LOC100861862		Gm22231	Gm13827
LOC100861877		Gm22232	Gm13829
LOC100861878		Gm22243	Gm13841|Rpl29
LOC100861887		Gm22264	Gm13862
LOC100861894		Gm22284	Gm13864
LOC100861897		Gm22299	Gm13868
LOC100861900		Gm22313	Gm13910
LOC100861912		Gm22323	Gm13921
LOC100861919		Gm22334	Gm13935
LOC100861921		Gm22353	Gm13981
LOC100861922		Gm22365	Gm13992
LOC100861927		Gm22370	Gm14029|RP23-160G19.1
LOC100861931		Gm22380	Gm14036
LOC100861940		Gm22403	Gm14038
LOC100861943		Gm22406	Gm14039
LOC100861949		Gm22424	Gm14044
LOC100861967		Gm22427	Gm14052
LOC100861976		Gm22438	Gm14053
LOC100861984		Gm22441	Gm14068|RP23-324H1.1
LOC100861985		Gm22461	Gm14094
LOC100861991		Gm22487	Gm14107
LOC100862001		Gm22500	Gm14115
LOC100862002		Gm22504	Gm14127
LOC100862008		Gm22520	Gm14131
LOC100862011		Gm22523	Gm14138
LOC100862023		Gm22536	Gm14165
LOC100862026		Gm22560	Gm14175
LOC100862033		Gm22565	Gm14231
LOC100862039		Gm22596	Gm14263
LOC100862040		Gm2260	Gm14274
LOC100862047		Gm22610	Gm14278
LOC100862056		Gm22619	Gm14279
LOC100862058		Gm22626	Gm14284
LOC100862061		Gm22635	Gm14295
LOC100862063		Gm22646	Gm14299
LOC100862078		Gm22660	Gm14303
LOC100862080		Gm22663	Gm14305
LOC100862081		Gm22667	Gm14308|Gm14430|Gm14432|Gm14434|0610010B08Rik|Gm4724|Gm4631
LOC100862102		Gm22672	Gm14308|Gm14430|Gm14434|0610010B08Rik|Gm4724
LOC100862104		Gm22678	Gm14308|Gm14430|Gm14434|0610010B08Rik|Gm4724
LOC100862109		Gm22690	Gm14308|Gm14430|Gm14434|0610010B08Rik|Gm4724
LOC100862111		Gm22702	Gm14308|Gm14430|Gm14434|0610010B08Rik|Gm4724|Gm11007
LOC100862140		Gm22709	Gm14308|Gm14430|Gm14434|0610010B08Rik|Gm4724|Gm11007|Gm2007
LOC100862154		Gm22715	Gm14323
LOC100862164		Gm22721	Gm14325
LOC100862171		Gm22728	Gm14326
LOC100862184		Gm22734	Gm14336
LOC100862186		Gm22735	Gm14373
LOC100862191		Gm2274	Gm14388
LOC100862193		Gm22780	Gm14391|Gm6710
LOC100862195		Gm22786	Gm14391|Gm6710
LOC100862196		Gm22792	Gm14398
LOC100862198		Gm22800	Gm14407
LOC100862201		Gm22802	Gm14411
LOC100862227		Gm22806	Gm14414
LOC100862236		Gm22813	Gm14418
LOC100862243		Gm22824	Gm14419
LOC100862251		Gm22854	Gm14427
LOC100862257		Gm22859	Gm14438
LOC100862285		Gm22880	Gm14439
LOC100862286		Gm22883	Gm14441
LOC100862316		Gm22889	Gm14460
LOC100862325		Gm22890	Gm14494
LOC100862335		Gm22901	Gm14497
LOC100862340		Gm22904	Gm14512
LOC100862343		Gm22918	Gm14513
LOC100862379		Gm22925	Gm14530
LOC100862382		Gm22926	Gm14541
LOC100862404		Gm22930	Gm14562
LOC215866		Gm22934	Gm14571
LOC432823		Gm22939	Gm14578
LOC432823		Gm22948	Gm14584
LOC432823		Gm22949	Gm14585
LOC432823		Gm22953	Gm14586
Lrrtm2		Gm22957	Gm14593
Lsm2		Gm22960	Gm14602
Luc7l		Gm22973	Gm14633
Maff		Gm22990	Gm14648
Malat1|MALAT1		Gm23005	Gm14650
Map1lc3b		Gm23007	Gm14680
Map3k8		Gm23010	Gm14681|LOC100861774
Map4k2		Gm23019	Gm14688
Mapk6		Gm23029	Gm14698
Mapk8ip3		Gm23051	Gm14701
Marcksl1-ps4		Gm23053	Gm14712
Mat2a		Gm23060	Gm14719
Mcoln2		Gm23086	Gm14730
Med29		Gm23087	Gm14733
Metap1d		Gm2310	Gm14775
Mettl1		Gm23100	Gm14776
Mettl2		Gm23115	Gm14837
Mfsd2a		Gm23123	Gm14853
Mgst2		Gm23131	Gm14859
Mid1		Gm23132	Gm14877
Mid1		Gm23134	Gm14878
Mif		Gm23162	Gm14928
Mif4gd		Gm23164	Gm14942
Mif-ps3		Gm23178	Gm14970
Mir103-1		Gm23190	Gm15002
Mir106b		Gm23193	Gm15013
Mir1186b		Gm23198	Gm15031
Mir1190		Gm23222	Gm15032
Mir1192		Gm23231	Gm15054
Mir1195		Gm23237	Gm15067
Mir128-1		Gm23243	Gm15148
Mir142		Gm23252	Gm15149
Mir142b		Gm23263	Gm15175
Mir142hg|RP23-449P23.3		Gm23266	Gm15180
Mir155		Gm23273	Gm15186
Mir15b		Gm23278	Gm15198
Mir17hg|Mir18|Mir20a|Mir19a|Mir19b-1|Mir92-1		Gm23297	Gm15210
Mir185		Gm23303	Gm15285
Mir186		Gm23323	Gm15289
Mir1905		Gm23328	Gm15309
Mir193b		Gm23334	Gm15312
Mir194-2		Gm23335	Gm15378
Mir1943		Gm23339	Gm15399
Mir1946b		Gm23343	Gm15400
Mir1957a		Gm23364	Gm15426
Mir1964		Gm23370	Gm15427
Mir212		Gm23377	Gm15429
Mir2136		Gm23389	Gm15443
Mir219c		Gm23391	Gm15464
Mir22|Mir22hg		Gm23401	Gm15467
Mir224		Gm23403	Gm15470
Mir23a		Gm23415	Gm15472|AC124698.6
Mir24-2		Gm23416	Gm15481
Mir27a		Gm23425	Gm15483
Mir296|Gm19544		Gm23438	Gm15484
Mir297-1		Gm23444	Gm15493
Mir297a-2		Gm23472	Gm15497
Mir297a-3		Gm23475	Gm15500
Mir297b|Mir297a-3|Mir297a-4		Gm23479	Gm15501
Mir301b		Gm23487	Gm15503|AC130474.1
Mir3058		Gm23488	Gm15516
Mir3079		Gm23489	Gm15526
Mir3091		Gm23492	Gm15531
Mir3097		Gm23521	Gm15536
Mir3098		Gm23546	Gm15537|RP23-312H15.4
Mir30e		Gm23553	Gm15539
Mir320		Gm23555	Gm15547
Mir325		Gm23562	Gm15549
Mir338		Gm23564	Gm15572
Mir3471-1		Gm23566	Gm15578
Mir3471-2		Gm23571	Gm15596
Mir363		Gm23576	Gm15602
Mir378b		Gm23584	Gm15607
Mir453		Gm23598	Gm15616
Mir466d		Gm23604	Gm15621
Mir466d		Gm23615	Gm15644
Mir466f-1		Gm23617	Gm15653
Mir466f-1		Gm23631	Gm15659
Mir466f-2		Gm23633	Gm15661
Mir466f-3		Gm23636	Gm15664
Mir466f-3		Gm23637	Gm15682
Mir466f-4		Gm23689	Gm15696
Mir466h		Gm23698	Gm15710
Mir466h		Gm23699	Gm15719
Mir466i		Gm23700	Gm15727
Mir466j		Gm23701	Gm15730
Mir466k		Gm23716	Gm15732
Mir466m		Gm23728	Gm15733
Mir466n		Gm23729	Gm15744
Mir466o		Gm23734	Gm15745
Mir466q		Gm23739	Gm15766
Mir467c		Gm23743	Gm15770
Mir467c		Gm23750	Gm15772
Mir467e		Gm23751	Gm15773
Mir467f		Gm23785	Gm15779
Mir467h		Gm23810	Gm15786
Mir5111		Gm23839	Gm15793
Mir5120		Gm23842	Gm15794|AC132284.1
Mir5123		Gm23849	Gm15795
Mir5125		Gm23865	Gm15796
Mir5125		Gm23876	Gm15800
Mir5128		Gm23881	Gm15838
Mir5710		Gm23882	Gm15843
Mir598		Gm2389	Gm15846
Mir6244		Gm23896	Gm15877
Mir6347		Gm23905	Gm15915
Mir6380		Gm2391	Gm15920
Mir6385		Gm23911	Gm15921
Mir6399		Gm23913	Gm15981
Mir6414		Gm23914	Gm15983|RP23-162H6.5
Mir669a-1		Gm23931	Gm15987|Mir7649
Mir669a-1|Mir669a-4|Mir669a-5|Mir669a-6|Mir669a-7|Mir669p-1|Mir669a-8|Mir669a-9|Mir669p-2|Mir669a-10|Mir669a-11|Mir669a-12		Gm23937	Gm16021
Mir669d		Gm23948	Gm16053
Mir669e		Gm23951	Gm16060
Mir669e		Gm2396	Gm16061
Mir669f		Gm23961	Gm16073
Mir669h		Gm23971	Gm16082
Mir669m-2		Gm23990	Gm16111
Mir669n		Gm23993	Gm16134
Mir669o		Gm24025	Gm16184
Mir677		Gm24026	Gm16200
Mir679		Gm24053	Gm16209
Mir687		Gm24054	Gm16210
Mir6905		Gm24060	Gm16219
Mir6907		Gm24069	Gm16238
Mir692-1		Gm24082	Gm16259
Mir692-2		Gm24093	Gm16269
Mir6924		Gm24115	Gm16276
Mir6927		Gm24130	Gm16283|AC112984.2
Mir6929		Gm24132	Gm16288
Mir6930		Gm24145	Gm16298
Mir6939		Gm24151	Gm16303
Mir6942		Gm24157	Gm16305
Mir6948		Gm24161	Gm16335
Mir6955		Gm24163	Gm16340
Mir6956		Gm24169	Gm16354
Mir6958		Gm24194	Gm16363
Mir6961		Gm24196	Gm16373
Mir6964		Gm24217	Gm16379
Mir6974		Gm24233	Gm16409
Mir6988		Gm24241	Gm16410
Mir6989		Gm24255	Gm16415
Mir6989		Gm2427	Gm16416
Mir6993		Gm24282	Gm16420
Mir6994		Gm24288	Gm16433
Mir7005		Gm24289	Gm16465
Mir7006		Gm2431	Gm16477
Mir7022		Gm24315	Gm16490
Mir7024		Gm24342	Gm16519
Mir7026		Gm24347	Gm16550
Mir7028		Gm24350	Gm16580
Mir7030		Gm2436	Gm16585
Mir7032		Gm24366	Gm16589
Mir7033		Gm24369	Gm17014
Mir7037		Gm24387	Gm17053
Mir7060		Gm24396	Gm17060
Mir7066		Gm24397	Gm17072
Mir7067		Gm24399	Gm17150
Mir7069		Gm24402	Gm17212
Mir7078		Gm24409	Gm17214
Mir7235		Gm24422	Gm17257
Mir743b		Gm24441	Gm17271
Mir7649		Gm2446	Gm17404
Mir7669		Gm24466	Gm17430
Mir7682		Gm24468	Gm17449
Mir7683		Gm24475	Gm17450
Mir8117		Gm24482	Gm17511
Mirlet7d		Gm24487	Gm17535
Mirt1		Gm24488	Gm17541
Mirt2		Gm24497	Gm17576
Mitd1		Gm24500	Gm17709
Mlycd		Gm24504	Gm17786
Mnda		Gm24510	Gm17828
Mndal		Gm24542	Gm18025
Mov10		Gm24543	Gm1818
Mpeg1		Gm24557	Gm1848
Mphosph10		Gm24564	Gm1866
Mreg		Gm24586	Gm19246
Mrgpra2a		Gm24603	Gm19261
Mrgpra2b		Gm24604	Gm19270
Mrpl50		Gm24606	Gm19327
Mrpl54		Gm24627	Gm19349
Mrps16		Gm24640	Gm19353
Mrto4		Gm24659	Gm19399
Ms4a4a		Gm24680	Gm19453
Ms4a4b		Gm24683	Gm1947
Ms4a4c		Gm24690	Gm19579
Ms4a6d		Gm24694	Gm19585
Msmp		Gm24714	Gm19706
Mt1		Gm24718	Gm19807
Mt2		Gm24721	Gm19816
mt-Ta		Gm24727	Gm19831
mt-Tc		Gm24733	Gm19886
mt-Te		Gm24735	Gm19912
mt-Tn		Gm24739	Gm19980
mt-Tp		Gm24752	Gm2000
mt-Tq		Gm24755	Gm20022
mt-Ts1		Gm24761	Gm2004
Muc1		Gm24770	Gm20140
Mup-ps28		Gm24780	Gm20169
Mx1		Gm24786	Gm20199
Mx2		Gm24789	Gm20245
Myb		Gm24798	Gm20253
Myc		Gm24811	Gm2026
Myo19		Gm24816	Gm20267
Naa20		Gm24834	Gm20302|Gm22758|Gm14173
Naf1		Gm24837	Gm20372
Nampt		Gm24840	Gm20402|RP24-337A16.1
Napa		Gm24888	Gm20430
Ncln		Gm24923	Gm20445
ND6		Gm24932	Gm20477
Ndufb9		Gm24935	Gm20568
Neat1		Gm24944	Gm20620
Neil1		Gm24954	Gm20656
Nfil3		Gm24963	Gm20657
Nfkbia		Gm24988	Gm20673
Nfkbid		Gm24992	Gm20674
Nfkbiz		Gm24996	Gm20702
Ngfrap1		Gm25000	Gm20712|RP23-102L5.1
Nip7		Gm25002	Gm20731
Nisch		Gm25003	Gm20900
Nle1		Gm25020	Gm20939
Nlrc5|Mir7072		Gm25038	Gm21182
Nlrp3		Gm25040	Gm21399
Nme2		Gm25062	Gm21738
Noc2l		Gm25063	Gm21742
Nop2		Gm25069	Gm21836
Nop56|Snord57		Gm25071	Gm21857|LOC100861837|Mid1
Npepl1		Gm25083	Gm21887
Npm3		Gm25113	Gm21957
Npm3-ps1		Gm25129	Gm21959
Npw		Gm25133	Gm21994|LOC100504621
Nr1h2		Gm25180	Gm22009
Nr1h2-ps		Gm25202	Gm22047
Nr4a1		Gm25216	Gm22105
Nr4a2		Gm25219	Gm22121
Nr4a3		Gm25227	Gm2214
n-R5s171		Gm25233	Gm22152
n-R5s202		Gm25244	Gm22154
n-R5s32		Gm25246	Gm22175
n-R5s54		Gm25248	Gm22192
Nsun5		Gm25250	Gm22193
Nt5c3		Gm25255	Gm22201
Nufip1		Gm25260	Gm2225
Nutf2|Nutf2-ps1		Gm25270	Gm22289
Nxf1|Tmem223		Gm25271	Gm22426
Oas1a		Gm25287	Gm22442
Oas1b		Gm25291	Gm22455
Oas1g		Gm25308	Gm22571
Oas2		Gm25349	Gm22582
Oas3		Gm25360	Gm22617
Oasl1		Gm25361	Gm22745
Oasl2		Gm25384	Gm22748
Odc1		Gm25395	Gm22757|Gm13875
Ogfr		Gm25396	Gm22759|Gm14251
Olfr1132		Gm25399	Gm22760|Gm12318
Olfr1321		Gm25404	Gm22761|Gm13879
Olfr1356		Gm25406	Gm22771
Olfr1371		Gm25424	Gm22888
Olfr1374-ps1		Gm25438	Gm23075
Olfr1375		Gm25456	Gm23105
Olfr1394		Gm25495	Gm23127
Olfr1417		Gm25508	Gm23169
Olfr1419		Gm25510	Gm23184
Olfr1456-ps1		Gm25529	Gm23300
Olfr267		Gm25537	Gm23344
Olfr313		Gm25541	Gm23346
Olfr432		Gm25548	Gm23362
Olfr538		Gm25549	Gm23442
Olfr544		Gm25567	Gm23530
Olfr556		Gm25568	Gm23619
Olfr646		Gm25569	Gm23626
Olfr666		Gm25570	Gm23663
Olfr719-ps		Gm25591	Gm23664
Olfr768		Gm25605	Gm23668
Olfr845		Gm25608	Gm23711
Olfr99		Gm25643	Gm2399
Oser1		Gm25649	Gm24022
Osgin1		Gm25659	Gm24076
Osgin2		Gm25673	Gm24091
P2ry10		Gm25677	Gm24112
Pank4		Gm25680	Gm24143
Papd7		Gm25693	Gm24264
Parp10		Gm25700	Gm24276
Parp12		Gm25701	Gm24312
Parp14		Gm25703	Gm24313
Parp9		Gm25717	Gm24371
Pced1a		Gm25738	Gm24438
Pde1b		Gm25766	Gm24494
Peak1os		Gm25776	Gm24498
Per1		Gm25777	Gm24507
Pfn3		Gm25787	Gm24524
Phf11a		Gm25803	Gm24588
Phf11b		Gm25813	Gm24865|Gm4613
Phf11d|Phf11c		Gm25820	Gm24920
Phlda1		Gm25831	Gm24949
Phxr1		Gm25835	Gm25106
Phxr4		Gm25848	Gm25128
Pigl		Gm25850	Gm25162
Pih1d1		Gm25860	Gm25203
Pik3r5		Gm25871	Gm25388
Pim1		Gm25880	Gm25394
Pim3		Gm25889	Gm25410
Pkd1l3		Gm25910	Gm25419
Pkmyt1		Gm25913	Gm25447
Plac8		Gm25939	Gm25474
Platr31		Gm25943	Gm25593|Gm11619
Plau		Gm25965	Gm25594
Plekhj1		Gm25996	Gm25632
Plekhn1		Gm25997	Gm25636
Plgrkt		Gm25998	Gm25663
Plk2		Gm26013	Gm25747
Plk3		Gm26014	Gm25806
Plp1		Gm26015	Gm25837
Plscr1		Gm26036	Gm25877
Pmaip1		Gm26037	Gm25931
Pmf1		Gm26050	Gm25936
Pml		Gm26051	Gm25949
Pnisr		Gm26052	Gm26109
Pnpt1		Gm26053	Gm26120
Polr1d		Gm26063	Gm26158
Polr2d		Gm26067	Gm26165
Polr2e		Gm26073	Gm26175
Polr2l		Gm26078	Gm26205
Pom121l12		Gm26080	Gm26236
Pop4		Gm26092	Gm26300|Gm11285
Pou2f2|Mir6537		Gm26095	Gm26384
Ppan		Gm26119	Gm26387
Ppcdc		Gm26135	Gm26457
Ppox		Gm26143	Gm26510
Ppp1r15a		Gm26148	Gm26517
Ppp2r3d|Ppp2r3a		Gm26150	Gm26779|RP24-267K12.1
Ppp5c		Gm26160	Gm26853
Prmt5		Gm26226	Gm26983
Prmt7		Gm26233	Gm27018
Proser1		Gm26238	Gm27152
Proser3		Gm26250	Gm27178
Prpf39		Gm26258	Gm27219
Prr22		Gm26259	Gm27248
Psmb6		Gm26260	Gm2735
Psmd14		Gm26280	Gm27529
Psmg1		Gm26302	Gm27530
Pstpip2		Gm26303	Gm27684
Ptafr		Gm26316	Gm27935
Ptbp2		Gm26353	Gm2808|Tulp4
Ptger4		Gm26368	Gm2830
Ptgs2		Gm26369	Gm2877
Ptp4a1|Gm13363		Gm26376	Gm29344|Gm7862
Pus7		Gm26398	Gm29376
Pusl1		Gm26399	Gm2976
Pvr		Gm26403	Gm2a
Pydc4		Gm26422	Gm3326
Pyhin1		Gm26431	Gm3329
Qtrt1		Gm26443	Gm3355
Qtrtd1		Gm26469	Gm3362
Rab10os		Gm26472	Gm3436
Ramp3		Gm26485	Gm3466
Ran		Gm26506	Gm3604
Rasd1		Gm26519	Gm3613
Rb1		Gm26523	Gm3617
Rbm39		Gm26526	Gm3625
Rbm3os		Gm26527	Gm3699
Rel		Gm26535	Gm3788
Retnlg		Gm26541	Gm3837
Rgcc		Gm26566	Gm3902
Rgl2		Gm26570	Gm3934
Rgs1		Gm26577	Gm3940
Rgs10		Gm26581|RP23-58L22.8	Gm4076
Rgs2		Gm26586	Gm4204
Rhob		Gm26602|LOC100862144	Gm4219|RP23-117I10.1
Rilpl2		Gm26623	Gm4242
Rltpr		Gm26628	Gm4246
Rn4.5s		Gm26634	Gm4294
Rnf125		Gm26637	Gm4342
Rnf126		Gm26648	Gm4462
Rnf213		Gm26649	Gm4468
Rpl12|Snora65		Gm26669	Gm4479
Rpl13-ps1		Gm26683	Gm4540
Rpl29		Gm26692	Gm4583
Rpl29-ps1		Gm26717	Gm4604
Rpl35		Gm26723|LOC100861669	Gm4617
Rpl36		Gm26732	Gm4660
Rpl36-ps3		Gm26748	Gm4705
Rpl39l		Gm26756	Gm4737
Rpl41		Gm26765	Gm4759
Rps26		Gm26768	Gm4761
Rps6kb2		Gm26773	Gm4775
Rrp9		Gm26778	Gm4825
Rsad2		Gm26805	Gm4832
Rtp4		Gm26809	Gm4877
Rundc3b		Gm26816	Gm4879
S100a8		Gm26825	Gm4883
S100a9		Gm26827	Gm4889
Samd9l		Gm26841	Gm4904
Sbno2		Gm26857	Gm4910
Scarna3b|Mir1843a		Gm26864	Gm4945
Scgb1b29		Gm26876	Gm4955
Scgb1b7		Gm26890	Gm4963
Sdc3		Gm26897	Gm4968
Sepw1		Gm26899	Gm4978
Serpina3e-ps		Gm26904	Gm4986
Serpina3f		Gm26905	Gm4987
Serpina3g		Gm26942	Gm4997
Sertad1		Gm26979|RP23-393I12.6	Gm5045
Setd8		Gm27004|RP23-156K23.2	Gm5070
Setdb2|Phf11c|Phf11d		Gm27010|RP24-271M20.8	Gm5093
Sf3b4		Gm27149	Gm5121
Sgk1		Gm27167|RP23-279M5.3	Gm5135
Sh3bp2		Gm27177|RP23-103I12.3	Gm5215
Shmt2		Gm27177|RP23-103I12.3	Gm5225
Siah2		Gm27190	Gm5239
Sik1		Gm27191|RP23-448K19.3	Gm5244
Slamf7		Gm27295	Gm5263
Slc15a2		Gm27306	Gm5269
Slc15a3		Gm27353	Gm5277
Slc16a1		Gm27359	Gm5292
Slc17a9		Gm27375	Gm5321
Slc1a5		Gm27397	Gm5384
Slc25a19		Gm27430	Gm5400
Slc25a22		Gm27437	Gm5421
Slc25a28		Gm27440	Gm5423
Slc25a33		Gm27449	Gm5445
Slc2a6		Gm27458	Gm5446
Slc38a2		Gm27459	Gm5449
Slc3a2		Gm27466	Gm5451
Slc41a1		Gm27490	Gm5453
Slc50a1		Gm27509	Gm5455
Slc7a11		Gm27525	Gm5459
Slc7a5		Gm27607	Gm5472
Slco4a1		Gm27628	Gm5481
Slfn2		Gm27649	Gm5499
Slfn4		Gm27653	Gm5512
Slfn5		Gm27663	Gm5519
Slfn8		Gm27682	Gm5528
Smarcc1|Gm10615		Gm27702	Gm5529
SMCR2_1		Gm27703	Gm5540
Snai1		Gm27704	Gm5555
Snap23		Gm27731	Gm5560
Snhg1|Snord22		Gm27785	Gm5561
Snhg17		Gm27792	Gm5566
Snhg5		Gm27839	Gm561
Snhg9		Gm27847	Gm5611
Snora20		Gm27881	Gm5614
Snora41		Gm27892	Gm5616
Snora74a|Mir1949|Snhg4		Gm27910	Gm5619
Snora7a		Gm27989	Gm5621
Snord14a		Gm28018	Gm5621
Snord37		Gm28022	Gm5638
Snord42a		Gm28033	Gm5643
Snord49a		Gm2825	Gm5687
Snord4a		Gm2840	Gm5708
Snord65|2410006H16Rik		Gm2862	Gm5745
Snord93		Gm2991	Gm5762
Snord98		Gm3139	Gm5764
Snord99|Snhg12|Snora61|Snora44		Gm3139	Gm5786
Snrpc		Gm3142	Gm5803
Snrpd1		Gm3233	Gm5805
Socs3		Gm3250	Gm5812
Sowahc		Gm3261	Gm5815
Sp110		Gm3331|RP23-93M1.2	Gm5822
Sp110		Gm3601	Gm5830
Sp140		Gm3608	Gm5843
Spty2d1		Gm4262	Gm5844
Srm		Gm4559	Gm5848
Srpk3		Gm4663	Gm5864
Srrt		Gm4758	Gm5866
Srsf2		Gm4827	Gm5879
Srsf3		Gm4915	Gm5898
Srsf6		Gm4991	Gm5908
Srsf7		Gm4992	Gm5913
ST7-OT4_2		Gm5068|S100a11-ps	Gm5921
Stat1		Gm5069	Gm5940
Stat2		Gm5071	Gm5942
Stat3		Gm5072|Gm5071|Gm8914	Gm5963
Stfa2l1		Gm5229	Gm5978
Stk16		Gm5331	Gm6020
Stmn1-rs1		Gm5382|Gm5132	Gm6023
Sub1		Gm5397	Gm6085
Supt20		Gm5416	Gm6109
Surf2		Gm5434	Gm6134
Syvn1		Gm5483	Gm6136
Taf1d|Gm25500		Gm5514	Gm6139
Tagap		Gm5530	Gm6142
Tagap1		Gm5533	Gm6161
Tank		Gm5537	Gm6177
Tap1		Gm5593	Gm6187|Gm10052
Tarm1		Gm5832	Gm6226
Tbrg4|Snora5c		Gm5859|Gm17081|LOC100862237	Gm6238
Tcf7		Gm5899	Gm6252
Tcirg1		Gm5900	Gm6254
Tcof1		Gm5916	Gm6272
Tfrc		Gm5925	Gm6274
Tgfbr3l		Gm5958	Gm6276
Tgif1		Gm6034	Gm6285
Tgif2		Gm6100	Gm6286
Tgif2-ps2		Gm614	Gm6292
Tgtp2		Gm6166	Gm6311
Thbd		Gm6169	Gm6334
Thbs1		Gm6232	Gm6341
Thoc1		Gm6263	Gm6344
Thoc6		Gm6264	Gm6361
Tigd5		Gm6280	Gm6374
Tiparp		Gm6305	Gm6377
Tmem184b		Gm6346	Gm6378
Tmem50b		Gm6348	Gm6382
Tmem88		Gm6358	Gm6397
Tnf		Gm6509	Gm6419
Tnfaip2		Gm6524	Gm6425
Tnfaip3		Gm6594	Gm6430
Tnk2os		Gm6623	Gm6433
Tob1		Gm6684	Gm6451
Tomm20		Gm6750	Gm6457
Tomm5		Gm6882	Gm6472
Tor3a		Gm6946	Gm6491
Tpst1		Gm6970	Gm6505
Tra2a		Gm6977	Gm6506
Traf4		Gm6985	Gm6564
Trafd1		Gm6993	Gm6565
Trav12n-3		Gm7099	Gm6570
Trav13-4-dv7		Gm7125	Gm6576
Trav13d-4		Gm7138	Gm6579
Trav13n-2		Gm7160	Gm6607
Trav3n-3|Trav3d-3		Gm7281	Gm6612
Trav7-1		Gm7367	Gm6613
Trbv12-2		Gm7457	Gm6630
Trbv21		Gm7485	Gm6640
Trem1		Gm7511	Gm6644
Trem3		Gm766	Gm6654
Trib1		Gm7676	Gm6689
Trim25		Gm7694	Gm6706
Trim30a		Gm7707	Gm6712
Trim30b		Gm7735	Gm6712
Trim30c		Gm7741	Gm6736
Trim30d		Gm7856	Gm6758
Trp53inp2		Gm7873	Gm6767
Tsga13		Gm7931	Gm6776
Tssk3		Gm7969	Gm6793
Tuba4a		Gm8016	Gm6807
Tyw5		Gm8091	Gm6808
Uba7		Gm8185	Gm6823
Ubald1		Gm8202	Gm6851
Ubald2|Gm7367		Gm8203	Gm6863
Ube2n		Gm8300	Gm6872
Ube2s		Gm8378	Gm6887
Uck2		Gm8439	Gm6901
Uck2		Gm8459	Gm6904
Uqcr10		Gm8569	Gm6919
Urm1		Gm8737	Gm6964
Usmg5		Gm8770	Gm6969
Usp18		Gm8773	Gm6984|Cbx3-ps6
Uxt		Gm8865	Gm6987
Vamp2		Gm8974	Gm6988
Vasn		Gm8995	Gm7020
Vegfa		Gm9025	Gm7027
Vmn1r143|Vmn1r95		Gm9051	Gm7079
Vmn1r239-ps		Gm9089	Gm7091
Vmn1r43		Gm9244	Gm7117|Gm10275
Vmn1r-ps109		Gm9324	Gm7123
Vps33b		Gm9340	Gm7180
Vps37b		Gm9525	Gm7204
Wdr46		Gm9581|RP24-120O11.3	Gm7206
Wdr74		Gm9639	Gm7222
Wdr83os		Gm9734	Gm7278
Wfdc17		Gm9736	Gm7289
Wfikkn1		Gm9818	Gm7290
Wsb1		Gm9823	Gm7312
Xaf1		Gm9845	Gm7324
Yrdc		Gm9933	Gm7331
Zbp1		Gm9949	Gm7332
Zbtb10		Gm9966	Gm7334
Zbtb21		Gm9985	Gm7335
Zbtb48		Gm9992	Gm7352
Zc3h12a		Gmfg	Gm7363
Zc3h7a		Gna15	Gm7389
Zfand2a		Gnb5	Gm7399
[truncated: 2,525 more rows]
